# Supplementary material for: Measuring quality of life of people with predementia and dementia and their caregivers: a systematic review protocol
Source: PubMed Central journal article supplement — BMJ Open. 2018 Mar 30;8(3):e019082. doi: 10.1136/bmjopen-2017-019082 (PMC5884378; doi:10.1136/bmjopen-2017-019082), 2018-03-30
Supplement: bmjopen-2017-019082.draft_revisions.pdf [file bmjopen-2017-019082.draft_revisions.pdf]

# BMJ Open

BMJ Open is committed to open peer review. As part of this commitment we make the peer review history of every article we publish publicly available.

When an article is published we post the peer reviewers' comments and the authors' responses online. We also post the versions of the paper that were used during peer review. These are the versions that the peer review comments apply to.

The versions of the paper that follow are the versions that were submitted during the peer review process. They are not the versions of record or the final published versions. They should not be cited or distributed as the published version of this manuscript.

BMJ Open is an open access journal and the full, final, typeset and author-corrected version of record of the manuscript is available on our site with no access controls, subscription charges or pay-per-view fees (<http://bmjopen.bmj.com>).

If you have any questions on BMJ Open's open peer review process please email [info.bmjopen@bmj.com](mailto:info.bmjopen@bmj.com)

# BMJ Open

## Measuring quality of life of dementia patients and their caregivers: a systematic review protocol

|                               |                                                                                                                                                                                                                                                                                                                                                                                                                                                                                                                                                                                                                                                                                                                                                                                                                                                                                                                                                                                                                                                                                                                                                                                          |
|-------------------------------|------------------------------------------------------------------------------------------------------------------------------------------------------------------------------------------------------------------------------------------------------------------------------------------------------------------------------------------------------------------------------------------------------------------------------------------------------------------------------------------------------------------------------------------------------------------------------------------------------------------------------------------------------------------------------------------------------------------------------------------------------------------------------------------------------------------------------------------------------------------------------------------------------------------------------------------------------------------------------------------------------------------------------------------------------------------------------------------------------------------------------------------------------------------------------------------|
| Journal:                      | <i>BMJ Open</i>                                                                                                                                                                                                                                                                                                                                                                                                                                                                                                                                                                                                                                                                                                                                                                                                                                                                                                                                                                                                                                                                                                                                                                          |
| Manuscript ID                 | bmjopen-2017-019082                                                                                                                                                                                                                                                                                                                                                                                                                                                                                                                                                                                                                                                                                                                                                                                                                                                                                                                                                                                                                                                                                                                                                                      |
| Article Type:                 | Protocol                                                                                                                                                                                                                                                                                                                                                                                                                                                                                                                                                                                                                                                                                                                                                                                                                                                                                                                                                                                                                                                                                                                                                                                 |
| Date Submitted by the Author: | 09-Aug-2017                                                                                                                                                                                                                                                                                                                                                                                                                                                                                                                                                                                                                                                                                                                                                                                                                                                                                                                                                                                                                                                                                                                                                                              |
| Complete List of Authors:     | <p>Landeiro, Filipa; University of Oxford, Nuffield Department of Population Health</p> <p>Walsh, Katie; University of Oxford, Nuffield Department of Population Health, Health Economics Research Centre</p> <p>Wace, Helena; University of Oxford, Nuffield Department of Population Health, Health Economics Research Centre</p> <p>Roberts, Nia; University of Oxford, UK, Bodleian Health Care Libraries, Lecomte, Pascal; Novartis AG</p> <p>Wittenberg, Raphael; London School of Economics and Political Science, Personal Social Services Research Unit</p> <p>Wolstenholme, Jane; University of Oxford, Department of Public Health</p> <p>Handels, Ron; Maastricht University, Alzheimer Centre Limburg, Department of Psychiatry and Neuropsychology, School of Mental Health and Neurosciences; Karolinska Institute, Department of Neurobiology, Care Science and Society, Division of Neurogeriatrics</p> <p>Roncancio-Diaz, Emilse; GE Healthcare, Life Sciences</p> <p>Potashman, Michele; Biogen, Value and Access</p> <p>Tockhorn-Heidenreich, Antje; Eli Lilly and Company</p> <p>Gray, Alastair; University of Oxford, Nuffield Department of Population Health</p> |
| Keywords:                     | Dementia < NEUROLOGY, Alzheimer's disease, quality of life, Systematic literature review, Utility                                                                                                                                                                                                                                                                                                                                                                                                                                                                                                                                                                                                                                                                                                                                                                                                                                                                                                                                                                                                                                                                                        |
|                               |                                                                                                                                                                                                                                                                                                                                                                                                                                                                                                                                                                                                                                                                                                                                                                                                                                                                                                                                                                                                                                                                                                                                                                                          |

SCHOLARONE™  
Manuscripts

1  
2  
3 **Measuring quality of life of dementia patients and their caregivers: a systematic review**  
4 **protocol**  
5

6 Filipa Landeiro, Katie Walsh, Helena Wace, Nia Roberts, Pascal Lecomte, Raphael Wittenberg,  
7  
8 Jane Wolstenholme, Ron Handels, Emilse Roncancio-Diaz, Michele H. Potashman, Antje  
9  
10 Tockhorn-Heidenreich, Alastair M. Gray, on behalf of the ROADMAP Group  
11  
12

13  
14  
15 Filipa Landeiro, Senior Researcher in Health Economics, Health Economics Research Centre,  
16  
17 Nuffield Department of Population Health, Old Road Campus, University of Oxford, Oxford,  
18  
19 OX3 7LF, UK  
20

21 Katie Walsh, Foundation Doctor, Health Economics Research Centre, Nuffield Department of  
22  
23 Population Health, Old Road Campus, University of Oxford, Oxford, OX3 7LF, UK  
24

25 Helena Wace, Foundation Doctor, Health Economics Research Centre, Nuffield Department of  
26  
27 Population Health, Old Road Campus, University of Oxford, Oxford, OX3 7LF, UK  
28

29  
30 Nia Roberts, Information Specialist, Bodleian Health Care Libraries, Old Road Campus,  
31  
32 University of Oxford, Oxford, OX3 7LF, UK  
33

34 Pascal Lecomte, Global Head Health Economic Modelling and Methodology, Novartis Pharma  
35  
36 AG, 4002 Basel, Switzerland  
37

38 Raphael Wittenberg, Associate Professorial Research Fellow, Personal Social Services Research  
39  
40 Unit, London School of Economics and Political Science, Houghton Street, London WC2A 2AE,  
41  
42 UK  
43

44 Jane Wolstenholme, Senior Health Economist, Health Economics Research Centre, Nuffield  
45  
46 Department of Population Health, Old Road Campus, University of Oxford, Oxford, OX3 7LF, UK  
47

48 Ron Handels, Researcher, Alzheimer Centre Limburg, Department of Psychiatry and  
49  
50 Neuropsychology, School for Mental Health and Neurosciences, Maastricht University,  
51  
52 Maastricht, The Netherlands, and Department of Neurobiology, Care Science and Society,  
53  
54 Division of Neurogeriatrics, Karolinska Institute, Stockholm, Sweden  
55  
56  
57

1  
2  
3 Emilse Roncancio-Diaz, Health Economics and Outcomes Research Manager, Life Sciences, GE  
4 Healthcare, White Lion Rd, Little Chalfont, Amersham HP7 9LL, UK

5  
6 Michele H. Potashman, Associate Director, Value and Access, Biogen, 225 Binney St,  
7  
8 Cambridge MA 02139, USA

9  
10 Antje Tockhorn-Heidenreich, Senior Research Scientist, Eli Lilly and Company, Erl Wood Manor,  
11  
12 Windlesham, GU20 6PH, UK

13  
14 Alastair M. Gray, Professor of Health Economics, Health Economics Research Centre, Nuffield  
15  
16 Department of Population Health, Old Road Campus, University of Oxford, Oxford, OX3 7LF, UK  
17  
18

19  
20  
21 Correspondence to: Filipa Landeiro [filipa.landeiro@dph.ox.ac.uk](mailto:filipa.landeiro@dph.ox.ac.uk)  
22  
23  
24  
25  
26  
27  
28  
29  
30  
31  
32  
33  
34  
35  
36  
37  
38  
39  
40  
41  
42  
43  
44  
45  
46  
47  
48  
49  
50  
51  
52  
53  
54  
55  
56  
57  
58  
59  
60

**Abstract**

**Introduction:** Dementia is the fastest growing major cause of disability globally and has a profound impact on the quality of life (QoL) of both the patient with dementia and those that care for them. This review aims to systematically identify and synthesize the measurements of QoL for patients and their caregivers across the full spectrum of dementia, from its preceding stage of pre-dementia to end of life.

**Methods and analysis:** A systematic literature review was conducted in MEDLINE, Embase, CDSR, CENTRAL, DARE, NHS EED, and PsycINFO between January 1990 and the end of April 2017. Two reviewers will independently assess each study for inclusion and disagreements will be resolved by a third reviewer. Data will be extracted using a pre-defined data extraction form following best practice. Study quality will be assessed with the Effective Public Health Practice Project quality assessment tool. QoL measurements will be presented separately for patients and caregivers by instrument used and, when possible, QoL will be reported by disease type and stage of the disease. Descriptive statistics of the results will be provided. A narrative synthesis of studies will also be provided discussing differences in QoL measurements by instrument used to estimate it, type of dementia and disease severity.

**Ethics and Dissemination:** This systematic literature review is exempt from ethics approval because the work is carried out on published documents. The findings of the review will be disseminated in a related peer-reviewed journal and presented at conferences. They will also contribute to the work developed in the Real World Outcomes across the Alzheimer's disease spectrum for better care: multi-modal data access platform (ROADMAP).

**Trial registration number:** CRD42017071416

**Keywords:** dementia, Alzheimer's disease, patient, caregiver, carer, quality of life, systematic review, utility

### Strengths of study

- This systematic literature review on quality of life of dementia patients and their caregivers is based on a detailed search strategy including studies from any country published in any language, covering the time frame from 1<sup>st</sup> January 1990 until 28<sup>th</sup> April 2017.
- The review follows robust guidelines and the quality of the papers included will be assessed using a validated tool.

### Limitations of study

- The heterogeneity in the way quality of life is measured and reported may not allow for direct comparisons between studies.

### Introduction

Dementia is a devastating global disease with little prospect of a cure or means of preventing its progression. In 2014, it was estimated to affect 7.1% of people aged 65 and above worldwide<sup>1</sup>. It is a debilitating neurodegenerative condition which causes a progressive and irreversible decline in cognitive, social and physical function. There are several types of dementia and some people may present with a combination of types. Alzheimer's disease (AD) is the most common cause of dementia, accounting for 60-80% of all cases<sup>2</sup>. Other causes include vascular dementia (VaD), frontotemporal dementia (FTD), dementia with Lewy bodies (DLB) and others. Irrespective of the cause, dementia results in significant decline in intellectual abilities, such as memory, and causes abnormalities in behaviour, insight and judgement, anxiety and depression, with eventual loss of physical functions and personality. This eventually becomes severe enough to interfere with a person's daily functioning and activities of daily living (ADLs).

1  
2  
3  
4  
5 The cognitive and functional decline associated with dementia has a profound impact on the  
6  
7 quality of life (QoL) of both the patient and those that care for them. QoL is now recognised as  
8  
9 an increasingly valued health outcome measure in dementia. With no cure, the focus of  
10  
11 attention in dementia care is to promote patient well-being and to maintain optimal QoL. As  
12  
13 QoL refers to all aspects of a person's life it can provide valuable information on the patient's  
14  
15 self-perception of health and intervention impact. QoL measures attempt to evaluate directly  
16  
17 the impact of dementia or interventions on people's ability to function in life. They have  
18  
19 therefore become a key way in which to assess the effectiveness of health and social service  
20  
21 interventions.  
22

23  
24  
25  
26 Dementia patients require long term care and support and the responsibility for caregiving  
27  
28 most often falls upon informal caregivers including family members, friends and neighbours.  
29  
30 These caregivers provide a valuable resource for dementia patients. There are over 700,000  
31  
32 informal caregivers of people with dementia estimated to be providing £12.4 billion of unpaid  
33  
34 care in the UK per year<sup>3</sup>. The work of these caregivers is vital to support the growing number  
35  
36 of people affected by dementia and without them the formal care system would likely  
37  
38 collapse. The National Dementia Strategy for England<sup>4</sup> recognises this and supporting  
39  
40 caregivers is now a national and international policy priority.  
41

42  
43  
44  
45 Given that caregivers of people with dementia are considered to be such an important  
46  
47 resource, it is important to ensure that their own QoL is satisfactory. For many, the experience  
48  
49 of caring for their loved ones provides personal satisfaction. However, the experience can also  
50  
51 have a negative impact. Caregivers often have high levels of anxiety, stress and depression<sup>5</sup> as  
52  
53 caring for people with dementia often places a heavy mental, physical, financial, and social  
54  
55 burden on them. Great demands are placed on caregivers who are often elderly themselves.  
56  
57

1  
2  
3 As a result caregivers might find themselves neglecting their own health and QoL. This could  
4 ultimately impact on the quality of the care that they provide for people with dementia.  
5  
6 Therefore, addressing caregivers' QoL is an important challenge.  
7  
8  
9

10  
11 Shearer et al.<sup>6</sup> conducted a systematic review of the literature on health value states for AD  
12 patients and their caregivers based on generic preference-based instruments<sup>6</sup>. Two recently  
13 published systematic reviews examined the factors associated with the QoL of dementia  
14 patients, either in all types of setting<sup>7</sup> or in long-term care facilities in particular<sup>8</sup>. A few  
15 reviews have identified QoL measures for dementia patients and their carers<sup>9-11</sup>. Caregiver  
16 burden has also been explored in a few systematic reviews, either identifying factors  
17 constituting caregiver burden on informal caregivers of dementia patients<sup>12</sup>, exploring the role  
18 of self-efficacy in health-related QoL (HRQoL) of family carers of dementia patients<sup>13</sup>,  
19 reviewing evidence for negative caregiver outcomes in mild cognitive impairment (MCI)<sup>14</sup> and  
20 synthesising risk factors, or reviewing caregiver burden and interventions for familial  
21 caregivers of Alzheimer's patients<sup>15</sup>. However, apart from Shearer et al.<sup>6</sup>, none of these  
22 reviews report measurements for QoL of these patients or caregivers. Furthermore, Shearer et  
23 al.<sup>6</sup> did not consider dementia-specific QoL measures. This review therefore aims to address  
24 this gap in the literature by addressing the following questions:  
25  
26  
27  
28  
29  
30  
31  
32  
33  
34  
35  
36  
37  
38  
39

- 40 1. What is the QoL for dementia patients across all stages of disease severity, from its  
41 preceding stage of pre-dementia to end of life?  
42  
43
- 44 2. What is the QoL for caregivers of dementia patients across all stages of disease  
45 severity, from its preceding stage of pre-dementia to end of life?  
46  
47  
48  
49  
50

## 51 **Methods and analysis**

### 52 53 Protocol and registration

54  
55 The preparation of this protocol followed the reporting guidelines of the Preferred Reporting  
56  
57



1  
2  
3 Items for Systematic Reviews and Meta-Analysis for Protocols 2015 (PRISMA-P)<sup>16</sup>. A completed  
4 PRISMA-P checklist is available in Supplementary file 1. The protocol was registered with the  
5 PROSPERO international prospective register of systematic reviews (registration number  
6 CRD42017071416). The systematic review manuscript will be prepared following the Preferred  
7 Reporting Items for Systematic Review and Meta-Analysis (PRISMA) statement<sup>17-19</sup>. In case of  
8 amendments to this protocol, they will be reported and published with the results of the  
9 review.  
10  
11  
12  
13  
14  
15  
16  
17  
18  
19

### 20 Study selection criteria

#### 21 *Participants*

22  
23 The focus of this review is on adult populations reporting to have either pre-dementia or  
24 dementia, irrespective of the type and stage of the disease, and their main caregivers.  
25  
26  
27  
28  
29

#### 30 *Study design*

31  
32 This systematic literature review will include studies reporting measurements of QoL for adult-  
33 onset pre-dementia or dementia patients and their caregivers published in peer-reviewed  
34 journals or theses. We will only include primary studies that provide quantitative results.  
35  
36 Qualitative studies will not be included.  
37  
38  
39  
40  
41  
42

43 The following study designs will be considered for inclusion: experimental studies, quasi-  
44 experimental studies, observational studies (either prospective or retrospective) and register-  
45 based studies. In cases where multiple studies used the same patient cohort, we will use the  
46 data from the study that presented the most detailed information on QoL. Case-studies, series  
47 of case-studies, studies with sample size of 30 or less patients, trial protocols, phase I clinical  
48 trials, news articles, interviews that do not use a structured quantitative questionnaire, patient  
49 education handouts, reviews, opinion or expert articles, editorials, letters to the editor,  
50  
51  
52  
53  
54  
55  
56  
57  
58  
59  
60

1  
2  
3 authors and editor's replies to comments will not be included.  
4  
5

6  
7 Modelling studies will be excluded but studies informing the model parameters will be  
8  
9 considered for inclusion. Similarly, existing reviews of QoL of dementia patients and their  
10  
11 caregivers will not be included but their reference lists will be screened for additional studies.  
12  
13 Conference abstracts will not be included. However, the abstracts will be screened to  
14  
15 determine whether the work presented has been published in a peer-reviewed journal or  
16  
17 thesis. If this is the case, then the published study will be considered for inclusion.  
18  
19

### 20 21 *Outcomes*

22  
23 The outcomes of interest are:

- 24  
25 • The QoL of patients with either pre-dementia or dementia;
- 26  
27 • The QoL of caregivers of patients with either pre-dementia or dementia.
- 28  
29

30  
31  
32 Where possible, the QoL of patients and their caregivers will be detailed by stage of the  
33  
34 disease: pre-clinical dementia (biomarker positive but pre-symptomatic), early symptoms  
35  
36 (memory and other behavioural changes), MCI, prodromal AD, mild dementia, moderate  
37  
38 dementia, severe dementia and end of life, in order to understand how QoL evolves  
39  
40 throughout disease progression.  
41  
42

### 43 44 *Quality of life*

45  
46 A wide range of instruments have been developed to measure QoL. These include both generic  
47  
48 and disease-specific instruments. Whereas generic QoL measures are universal and cover  
49  
50 general health aspects, regardless of the presence of absence of a disease, disease-specific QoL  
51  
52 measures target individual diseases and aim to emphasise the problems specific to patients  
53  
54 with a specific disease, such as dementia. These generic and disease-specific instruments can  
55  
56

1  
2  
3 be further subdivided into preference or non-preference depending on whether the index has  
4  
5 been derived by using preference weights obtained from patients or the general public, or  
6  
7 using simple summation of item scores.  
8  
9  
10

11  
12 In this review we will include any study reporting a quantitative measurement of QoL,  
13  
14 regardless of the instrument used to estimate it.  
15  
16

#### 17 18 *Intervention*

19  
20 All types of interventions related to dementia, either symptomatic or disease modifying, will  
21  
22 be included. We will also include studies that have not assessed any intervention.  
23  
24  
25

#### 26 27 *Language*

28  
29 No language restrictions were applied to the search.  
30  
31

#### 32 33 *Setting*

34  
35 No geography restrictions were applied to the search.  
36  
37  
38

#### 39 40 *Search strategy*

##### 41 42 *Electronic databases*

43  
44 The selection of the electronic databases used was carried out with the assistance of an  
45  
46 information specialist. The search terms were devised in conjunction with an information  
47  
48 specialist based on the search strategy of a previous literature review<sup>6</sup>. Medical Literature  
49  
50 Analysis and Retrieval System Online (MEDLINE), Excerpta Medica dataBASE (Embase),  
51  
52 Cochrane Database of Systematic Reviews (CDSR), Central Register of Controlled Trials  
53  
54 (CENTRAL), Database of Abstracts of Reviews of Effects (DARE), NHS Economic Evaluation  
55  
56  
57  
58  
59

1  
2  
3 Database (NHS EED), and PsycINFO were searched for studies published between 1<sup>st</sup> January  
4 1990 and 28<sup>th</sup> April 2017. Supplementary file 2 provides a description of the search terms used  
5  
6 in each database.  
7  
8  
9

### 10 11 *Manual searches*

12  
13 The reference list of the studies included in this review, as well as those of previous literature  
14 reviews on QoL across the full spectrum of dementia, will be searched in order to identify  
15 additional potentially relevant studies. The studies informing the model parameters in  
16 identified modelling studies will be considered for inclusion. Conference abstracts identified  
17 through the electronic searches will be screened and manuscripts of relevant abstracts will be  
18 manually searched for.  
19  
20  
21  
22  
23  
24  
25  
26  
27

### 28 *Study selection*

29  
30 ENDNOTE X7, Thomson Reuters, will be used for reference management. Database results will  
31 be imported to ENDNOTE where duplicates will be removed by one reviewer (KW) based on  
32 title and first author name. Subsequently, two reviewers (FL and KW) will independently assess  
33 the titles and abstract of the studies to determine whether full text review is needed, with  
34 disagreement being resolved by a third reviewer (HW). Full text will be sought for potentially  
35 relevant studies and assessed for final inclusion by two reviewers (FL and KW) with  
36 disagreements being resolved by a third reviewer (HW). The full selection process will be  
37 presented in a flow diagram according to PRISMA guidelines<sup>17</sup>.  
38  
39  
40  
41  
42  
43  
44  
45  
46  
47  
48

### 49 *Data extraction*

50  
51 Two of three reviewers (FL, KW and ERD) will extract the data from the final set of studies onto  
52 a data extraction form (Supplementary file 3) with disagreements being solved by the third  
53 reviewer. Two native or fluent speakers will review and extract the data for the non-English  
54  
55  
56  
57  
58  
59  
60

1  
2  
3 references. The following information will be extracted:

- 4 ● Study details: title, author, publication details, language of the study, countries of the  
5 study;  
6
- 7 ● Study design: aim of the study, type of study, type of analysis, duration, outcomes  
8 measured, instruments used to measure them, administration mode;  
9
- 10 ● Participant information: type of participant, setting, inclusion and exclusion criteria,  
11 sample size, socio-demographic information, self or proxy-rating;  
12
- 13 ● Disease specific information: type of dementia, level of severity, instrument used to  
14 measure level of severity;  
15
- 16 ● Outcomes: outcomes measured, time points measured, subgroup analysis conducted;  
17
- 18 ● Results: QoL of patients by disease severity, QoL of caregivers by disease severity of  
19 the patients (where studies report QoL using different instruments or report the same  
20 instrument in different ways, data will be extracted for each of them);  
21
- 22 ● Conclusions: Authors conclusions.  
23  
24  
25  
26  
27  
28  
29  
30  
31  
32  
33

#### 34 *Risk of bias (quality) assessment*

35  
36 The Effective Public Health Practice Project “Quality assessment tool for quantitative studies”<sup>20</sup>  
37 recommended by the Cochrane Public Health Group will be used to assess the quality of the  
38 studies included in this review as it covers a wide range of study designs<sup>21</sup>. Two of three  
39 reviewers (FL, KW and ERD) will independently assess each study and two native or fluent  
40 speakers will independently assess the quality of each of the non-English studies.  
41  
42  
43  
44  
45  
46  
47  
48

#### 49 *Description of studies and analysis*

50  
51 We expect to find a diverse range of QoL measures for both patients and caregivers. The QoL  
52 measurements will be presented separately for patients and caregivers by instrument used  
53 and, if possible, graphically. When described, distinction will be made between the different  
54  
55  
56  
57  
58  
59  
60

1  
2  
3 types of dementia, but with a special emphasis on Alzheimer's disease, the most common  
4  
5 form. If possible, QoL will be reported for each stage of the disease and if the QoL was self-  
6  
7 rated or proxy-rated informed by a caregiver or care/research professional. Descriptive  
8  
9 statistics of the results will be provided.

10  
11  
12  
13 A narrative synthesis of all relevant studies will be provided discussing differences in QoL  
14  
15 measurements by instrument used to estimate it, type of dementia, disease severity, and  
16  
17 describing study and participants' characteristics, results and author's conclusions.

18  
19  
20  
21 In case the study does not provide all the necessary data for our analysis, we will contact the  
22  
23 authors of the studies included in this review to attempt to retrieve it.

#### 24 25 26 27 28 Ethics and dissemination

29  
30 This systematic literature review is exempt from ethical approval because the work will be  
31  
32 carried out on published documents. The studies that are included in this review will be  
33  
34 examined to determine if ethical issues have been considered. The results of this review will be  
35  
36 disseminated in a peer-reviewed journal and presented at conferences, and will also  
37  
38 contribute to the Real World Outcomes across the Alzheimer's disease spectrum for better  
39  
40 care: multi-modal data access platform (ROADMAP).

#### 41 42 43 44 **Discussion**

45  
46 This systematic literature review will identify and synthesize the measurements of QoL, both  
47  
48 preference and non-preference based, for patients across the full spectrum of dementia from  
49  
50 MCI, pre-dementia and dementia to end of life, and their caregivers. QoL is increasingly seen  
51  
52 as an important outcome in dementia research and this level of detailed measurements of QoL  
53  
54 will be useful and help to better inform disease progression and cost-effectiveness models of  
55  
56

1  
2  
3 dementia.

4  
5  
6  
7 We will present QoL measurements separately by disease type, when the information is  
8  
9 available. The main focus of our research is on Alzheimer's disease, the most common form of  
10  
11 dementia, but given the lack of diagnostic accuracy and the recognised overlap between  
12  
13 different causes of dementia, all forms of dementia will be considered.  
14

15  
16  
17 Even though HRQoL as a measurement of the health status of individuals has been used since  
18  
19 the second half of the 20<sup>th</sup> century, it was only in the 1990s that its use increased with the  
20  
21 introduction of instruments such as EQ-5D-3L<sup>22</sup> and SF-6D<sup>23</sup>. As such, this review will include  
22  
23 published studies on QoL since 1990. Furthermore, no languages or geographic restrictions  
24  
25 were applied to the searches.  
26

27  
28  
29  
30 In conclusion, the results of this review could inform models assessing interventions on  
31  
32 dementia for both patients and their caregivers by providing information about patient's and  
33  
34 caregiver's perspective on treatment benefits. Additionally, this synthesis of QoL  
35  
36 measurements for dementia patients and their caregivers can help policy makers better  
37  
38 understand the impact of this staggering clinical condition.  
39

#### 40 41 42 **Funding**

43  
44 This project has received funding from the Innovative Medicines Initiative 2 Joint Undertaking  
45  
46 under grant agreement No 116020 ("ROADMAP"). This Joint Undertaking receives support  
47  
48 from the European Union's Horizon 2020 research and innovation programme and EFPIA.  
49

#### 50 51 52 **Competing interests**

53  
54  
55 FL, HW, KW, NR, RW, JW and AMG declare that they have no competing interests. PL is  
56  
57

1  
2  
3 employed by, owns stock in, and has stock options in Novartis Pharma AG. RH has received  
4 consulting fees from Roche, Nutricia and Piramal; research grants from private/public  
5 collaborations: IMI2-ROADMAP; Alzheimer Netherlands Flutemetamol; CTMM LEARN Grant 02  
6  
7 N-101; and public grants from: JPND Actifcare; and JPND BIOMARKAPD. ERD is employed by GE  
8  
9 Healthcare. MP is an employee of Biogen and owns stock in Biogen. She owns stock in a variety  
10  
11 of companies that at times include other pharmaceutical and health care-related companies.  
12  
13 ATH is an employee of Eli Lilly and Company Limited and owns stock in Eli Lilly and Company  
14  
15 Limited. Novartis Pharma AG, GE Healthcare, Biogen and Eli Lilly and Company Limited are  
16  
17 industry partners in the ROADMAP Project.  
18  
19  
20  
21  
22  
23

#### 24 **Contributors**

25  
26 FL designed the study and is the guarantor of the review. FL, KW and HW wrote the protocol.  
27  
28 FL, NR, RW, JW, RH, MHP, ATH and AMG devised the search strategy. PL, RW, JW, RH, ERD,  
29  
30 MHP, ATH, and AMG critically appraised the protocol and also contributed to its development  
31  
32 by revising different versions. All authors read and approved the final version of the  
33  
34 manuscript.  
35  
36  
37

#### 38 **Acknowledgments**

39  
40 We would like to acknowledge the contributions of the remaining members of Work Package 5  
41  
42 as well as of those of the wider ROADMAP group.  
43  
44  
45  
46

#### 47 **References**

- 48  
49 1. Prince M, Knapp M, Guerchet M, et al. Dementia UK: update. Alzheimer's Society 2014.  
50 2. Association As. 2017 Alzheimer's disease facts and figures. Alzheimer's & Dementia  
51 2017;**13**(4):325-73.  
52 3. Lewis F, Karlsberg Schaffer S, Sussex J, et al. The trajectory of dementia in the UK—Making a  
53 difference. OHE Consulting 2014.  
54 4. Banerjee S, Owen J. Living well with dementia: a national dementia strategy. London:  
55 Department of Health 2009.  
56 5. Schoenmakers B, Buntinx F, Delepeleire J. Factors determining the impact of care-giving on  
57  
58  
59  
60



- caregivers of elderly patients with dementia. A systematic literature review. *Maturitas* 2010;**66**(2):191-200.
6. Shearer J, Green C, Ritchie CW, et al. Health state values for use in the economic evaluation of treatments for Alzheimer's disease. *Drugs & aging* 2012;**29**(1):31-43.
7. Jing W, Willis R, Feng Z. Factors influencing quality of life of elderly people with dementia and care implications: A systematic review. *Archives of Gerontology and Geriatrics* 2016;**66**:23-41.
8. Beerens HC, Zwakhalen SM, Verbeek H, et al. Factors associated with quality of life of people with dementia in long-term care facilities: a systematic review. *International journal of nursing studies* 2013;**50**(9):1259-70.
9. Aspden T, Bradshaw SA, Playford ED, et al. Quality-of-life measures for use within care homes: a systematic review of their measurement properties. *Age and Ageing* 2014;**43**(5):596-603.
10. Jones C, Edwards RT, Hounsborne B. Health economics research into supporting carers of people with dementia: A systematic review of outcome measures. *Health and Quality of Life Outcomes* 2012;**10**(1):142.
11. Algar K, Woods RT, Windle G. Measuring the quality of life and well-being of people with dementia: A review of observational measures. *Dementia (London, England)* 2016;**15**(4):832-57.
12. Chiao CY, Wu HS, Hsiao CY. Caregiver burden for informal caregivers of patients with dementia: A systematic review. *International nursing review* 2015;**62**(3):340-50.
13. Crellin NE, Orrell M, McDermott O, et al. Self-efficacy and health-related quality of life in family carers of people with dementia: a systematic review. *Ageing Ment Health* 2014;**18**(8):954-69.
14. Seeher K, Low LF, Reppermund S, et al. Predictors and outcomes for caregivers of people with mild cognitive impairment: a systematic literature review. *Alzheimer's & dementia : the journal of the Alzheimer's Association* 2013;**9**(3):346-55.
15. Wennberg A. DC, Streetman-Loy B., Pham H., Alzheimer's Patient Familial Caregivers: A Review of Burden and Interventions. *Health and Social Work* 2015;**40**(4):e162-e69.
16. Shamseer L, Moher D, Clarke M, et al. Preferred reporting items for systematic review and meta-analysis protocols (PRISMA-P) 2015: elaboration and explanation. *Bmj* 2015;**349**:g7647.
17. Moher D, Liberati A, Tetzlaff J, et al. Preferred reporting items for systematic reviews and meta-analyses: the PRISMA statement. *PLoS med* 2009;**6**(7):e1000097.
18. Liberati A, Altman DG, Tetzlaff J, et al. The PRISMA statement for reporting systematic reviews and meta-analyses of studies that evaluate health care interventions: explanation and elaboration. *PLoS Med* 2009;**6**(7):e1000100.
19. Welch V, Petticrew M, Tugwell P, et al. PRISMA-Equity 2012 extension: reporting guidelines for systematic reviews with a focus on health equity. *Revista Panamericana de Salud Pública* 2013;**34**(1):60-67.
20. Thomas H. Quality assessment tool for quantitative studies. Effective Public Health Practice Project McMaster University, Toronto 2003.
21. Armijo-Olivo S, Stiles CR, Hagen NA, et al. Assessment of study quality for systematic reviews: a comparison of the Cochrane Collaboration Risk of Bias Tool and the Effective Public Health Practice Project Quality Assessment Tool: methodological research. *Journal of evaluation in clinical practice* 2012;**18**(1):12-18.
22. EuroQol--a new facility for the measurement of health-related quality of life. *Health policy (Amsterdam, Netherlands)* 1990;**16**(3):199-208.
23. Brazier J, Usherwood T, Harper R, et al. Deriving a preference-based single index from the UK SF-36 Health Survey. *Journal of clinical epidemiology* 1998;**51**(11):1115-28.

*Supplementary file 1: PRISMA-P checklist*

| Section and topic                    | Item No. | Checklist Item                                                                                                                                                                                                                | Reported on page #   |
|--------------------------------------|----------|-------------------------------------------------------------------------------------------------------------------------------------------------------------------------------------------------------------------------------|----------------------|
| <b>A) Administrative Information</b> |          |                                                                                                                                                                                                                               |                      |
| Identification                       | 1a       | Identify the report as a protocol of a systematic review                                                                                                                                                                      | 1                    |
| Update                               | 1b       | Identify protocol as an update of a previous systematic review if applicable                                                                                                                                                  | n/a                  |
| Registration                         | 2        | Name of registry and registration number                                                                                                                                                                                      | 2                    |
| <b>B) Authors</b>                    |          |                                                                                                                                                                                                                               |                      |
| Contact                              |          | Provide name, institutional affiliation, e-mail address of all protocol authors; provide physical mailing address of corresponding author                                                                                     | 1                    |
| Contributions                        |          | Describe contributions of protocol authors and identify the guarantor of the review                                                                                                                                           | 1 + 12               |
| Amendments                           |          | If the protocol represents an amendment of a previously completed or published protocol, identify as such and list changes; otherwise, state plan for documenting important protocol amendments                               | n/a                  |
| Support                              |          |                                                                                                                                                                                                                               |                      |
| - Sources                            | 5a       | Indicate Sources of financial or other support for the review                                                                                                                                                                 | 12                   |
| - Sponsor                            | 5b       | Provide name for the review funder and/or sponsor                                                                                                                                                                             | 11                   |
| - Role of sponsor or funder          | 5c       | Describe roles of funder(s), sponsor(s) and/or institution(s), if any, in developing the protocol                                                                                                                             | 13                   |
| <b>C) Introduction</b>               |          |                                                                                                                                                                                                                               |                      |
| Rationale                            | 6        | Describe the rationale for the review in the context of what is already known                                                                                                                                                 | 3 + 4                |
| Objectives                           | 7        | Provide an explicit statement of the question(s) the review will address with reference to participants, interventions, comparators, and outcomes (PICO)                                                                      | 4 + 5                |
| <b>D) Methods</b>                    |          |                                                                                                                                                                                                                               |                      |
| Eligibility Criteria                 | 8        | Specify the study characteristics (such as PICO, study design, setting, time frame) and report characteristics (such as years considered, language, publication status) to be used as criteria for eligibility for the review | 5 + 6 + 7            |
| Information Sources                  | 9        | Describe all intended information sources (such as electronic databases, contact with study authors, trial registers or other grey literature sources) with planned dates of coverage                                         | 7 + 8                |
| Search Strategy                      | 10       | Present draft of search strategy to be used for at least one electronic database, including planned limits, such that it could be repeated                                                                                    | Supplementary file 2 |
| <b>E) Study Records</b>              |          |                                                                                                                                                                                                                               |                      |
| Data Management                      | 11a      | Describe the mechanism(s) that will be used to manage records and data throughout the review                                                                                                                                  | 8                    |

|                                    |                 |                                                                                                                                                                                                                      |                                  |
|------------------------------------|-----------------|----------------------------------------------------------------------------------------------------------------------------------------------------------------------------------------------------------------------|----------------------------------|
| Selection Process                  | 11b             | State the process that will be used for selecting studies (such as two independent reviewers) through each phase of the review (that is, screening, eligibility and inclusion in meta-analysis)                      | 5 - 10                           |
| Data Collection Process            | 11c             | Describe planned method of extracting data from reports (such as piloting forms, done independently, in duplicate), any processes for obtaining and confirming data from investigators                               | 8 - 10 +<br>Supplementary file 3 |
| Data Items                         | 12              | List and define all variables for which data will be sought (such as PICO items, funding sources), any pre-planned data assumptions and simplifications                                                              | 8 - 9                            |
| Outcomes and prioritization        | 13              | List and define all outcomes for which data will be sought, including prioritization of main and additional outcomes, with rationale                                                                                 | 6 + 9                            |
| <b>Section and topic</b>           | <b>Item No.</b> | <b>Checklist Item</b>                                                                                                                                                                                                | <b>Reported on page #</b>        |
| Risk of bias in individual studies | 14              | Describe anticipated methods for assessing risk of bias of individual studies, including whether this will be done at the outcome or study level, or both; state how this information will be used in data synthesis | 9                                |
| Data Synthesis                     | 15a             | Describe criteria under which study data will be quantitatively synthesised                                                                                                                                          | 9 + 10                           |
|                                    | 15b             | If data are appropriate for quantitative synthesis, describe planned summary measures, methods of handling data and methods of combining data from studies, including any planned exploration of consistency         | 10                               |
|                                    | 15c             | Describe any proposed additional analyses (such as sensitivity or subgroup analyses, meta-regression)                                                                                                                | 10                               |
|                                    | 15d             | If quantitative synthesis is not appropriate, describe the type of summary planned                                                                                                                                   | 9 – 10                           |
| Meta-bias(es)                      | 16              | Specify any planned assessment of meta-bias(es) (such as publication bias across studies, selective reporting within studies)                                                                                        | n.a.                             |
| Confidence in cumulative evidence  | 17              | Describe how the strength of the body of evidence will be assessed                                                                                                                                                   | 9 – 10                           |

## Supplementary file 2: Search terms

## Medline

| #  | Searches                                                                                                                                                                                                                                                                                                                                                                                                                                                                                                              | Results |
|----|-----------------------------------------------------------------------------------------------------------------------------------------------------------------------------------------------------------------------------------------------------------------------------------------------------------------------------------------------------------------------------------------------------------------------------------------------------------------------------------------------------------------------|---------|
| 1  | *dementia/ or *alzheimer disease/ or exp *dementia, vascular/ or exp *frontotemporal lobar degeneration/                                                                                                                                                                                                                                                                                                                                                                                                              | 98,731  |
| 2  | *Cognitive Dysfunction/                                                                                                                                                                                                                                                                                                                                                                                                                                                                                               | 4,368   |
| 3  | (dementia* or alzheimer*).ti.                                                                                                                                                                                                                                                                                                                                                                                                                                                                                         | 92,750  |
| 4  | ((mild* or early* or preclinical or pre-clinical) adj2 (cognitive impair* or cognitive dysfunction or cognitive decline)).ti.                                                                                                                                                                                                                                                                                                                                                                                         | 5,582   |
| 5  | 1 or 2 or 3 or 4                                                                                                                                                                                                                                                                                                                                                                                                                                                                                                      | 118,970 |
| 6  | *"Quality of Life"/                                                                                                                                                                                                                                                                                                                                                                                                                                                                                                   | 69,834  |
| 7  | ("quality of life" or "quality of wellbeing" or "quality of well-being").ti.                                                                                                                                                                                                                                                                                                                                                                                                                                          | 55,455  |
| 8  | (qol or hqol or hrqol or hrql or hr-qol or hr-ql or euroqol or euro qol or eq5d or eq-5d or eq-vas or vas or whoqol or who qol or reqol*).ti,ab.                                                                                                                                                                                                                                                                                                                                                                      | 81,919  |
| 9  | (sf6 or sf6d or sf12 or sf16 or sf20 or sf36).ti,ab.                                                                                                                                                                                                                                                                                                                                                                                                                                                                  | 2,656   |
| 10 | ((sf or shortform or short-form) adj ("6" or 6d or "12" or "16" or "20" or "36" or six or twelve or sixteen or twenty or thirtysix or thirty six)).ti,ab.                                                                                                                                                                                                                                                                                                                                                             | 26,238  |
| 11 | (icepop or icecap* or duke health profile or dhp or core outcome measure? or core om).ti,ab.                                                                                                                                                                                                                                                                                                                                                                                                                          | 2,772   |
| 12 | (aaiqol or aai-qol or cdqlp or qolas or qolad or qol-ad or qold or dqol or demqol or adrql or adrql or oqold or oqolda or seiql or rsoc-qol or qualid or qualidem or qwb-sa or hsq-12 or zbi or zarit or ces-d or "activity and affect indicator*" or dcm or pwbcip or pwb-cip or npi-d or ham-d or basquid or basqid or stai or stai-5 or bdi or gds or gps or hui or hui-ii or hui-iii or isd or pds or pes-ad or pesad or pes-ad-aes or pesadaes or ghq or cas or cbs or qwb or cbi or bsi or srb or phq-9).ti,ab. | 82,505  |
| 13 | (modified coop* or modified wonca* or "psychological well-being in cognitively impaired persons").ti,ab.                                                                                                                                                                                                                                                                                                                                                                                                              | 23      |
| 14 | *Personal Satisfaction/ or *Patient Satisfaction/                                                                                                                                                                                                                                                                                                                                                                                                                                                                     | 31,894  |
| 15 | ((life or patient* or carer? or caregiver? or spous* or wife or wives or husband?) adj satisfaction).ti.                                                                                                                                                                                                                                                                                                                                                                                                              | 7,129   |
| 16 | ((life or patient* or carer? or caregiver? or spous* or wife or wives or husband?) adj (experience? or preference? or perspective?)).ti.                                                                                                                                                                                                                                                                                                                                                                              | 8,647   |
| 17 | (wellbeing or well-being).ti.                                                                                                                                                                                                                                                                                                                                                                                                                                                                                         | 11,493  |
| 18 | ((life or patient* or carer? or caregiver? or spous* or wife or wives or husband?) adj (experience? or preference? or perspective?)).ti.                                                                                                                                                                                                                                                                                                                                                                              | 8,647   |
| 19 | caregiver time.ti,ab.                                                                                                                                                                                                                                                                                                                                                                                                                                                                                                 | 140     |
| 20 | 14 or 15 or 16 or 17 or 18 or 19                                                                                                                                                                                                                                                                                                                                                                                                                                                                                      | 51,145  |
| 21 | "surveys and questionnaires"/ or self report/                                                                                                                                                                                                                                                                                                                                                                                                                                                                         | 394,101 |
| 22 | (questionnaire? or survey?).ti,ab.                                                                                                                                                                                                                                                                                                                                                                                                                                                                                    | 804,666 |
| 23 | self report.ti,ab.                                                                                                                                                                                                                                                                                                                                                                                                                                                                                                    | 42,432  |
| 24 | ((patient* or carer? or caregiver? or spous* or wife or wives or husband? or proxy) adj report?).ti,ab.                                                                                                                                                                                                                                                                                                                                                                                                               | 7,095   |
| 25 | 21 or 22 or 23 or 24                                                                                                                                                                                                                                                                                                                                                                                                                                                                                                  | 976,414 |

|    |                                                                                                                                                                                 |           |
|----|---------------------------------------------------------------------------------------------------------------------------------------------------------------------------------|-----------|
| 26 | 20 and 25                                                                                                                                                                       | 23,719    |
| 27 | *Caregivers/ and *"Cost of Illness"/                                                                                                                                            | 1,619     |
| 28 | ((carer? or caregiver? or care or spouse* or wife or wives or husband?) adj2 (burden* or cost?)).ti.                                                                            | 5,142     |
| 29 | burden interview?.ti.                                                                                                                                                           | 50        |
| 30 | "value of life".ti.                                                                                                                                                             | 87        |
| 31 | *"Activities of Daily Living"/                                                                                                                                                  | 17,986    |
| 32 | ("activities of daily living" or acdl or functional status).ti.                                                                                                                 | 1,772     |
| 33 | *quality-adjusted life years/                                                                                                                                                   | 1,917     |
| 34 | ("quality adjusted life years" or "disability adjusted life years" or qaly? or daly? or qald or qale or qtime or qaly).ti.                                                      | 764       |
| 35 | *Health Status/                                                                                                                                                                 | 34,353    |
| 36 | *sickness impact profile/                                                                                                                                                       | 2,623     |
| 37 | (standard gamble or "time trade off" or utility index or visual analog*).ti,ab.                                                                                                 | 48,455    |
| 38 | (health utilit* or disutilit* or utility value?).ti,ab.                                                                                                                         | 2,889     |
| 39 | health status.ti.                                                                                                                                                               | 9,145     |
| 40 | 6 or 7 or 8 or 9 or 10 or 11 or 12 or 13 or 26 or 27 or 28 or 29 or 30 or 31 or 32 or 33 or 34 or 35 or 36 or 37 or 38 or 39                                                    | 322,206   |
| 41 | 5 and 40                                                                                                                                                                        | 4,530     |
| 42 | limit 41 to yr="1990 -Current"                                                                                                                                                  | 4,445     |
| 43 | (case reports or clinical trial phase i or comment or editorial or letter).pt. or Clinical Trials, Phase I as Topic/ or (case report or case study or letter? or editorial).ti. | 3,400,815 |
| 44 | grounded theory/ or exp qualitative research/ or (qualitative research or qualitative study or qualitative interview* or grounded theory or hermeneutic*).ti,ab.                | 67,630    |
| 45 | 43 or 44                                                                                                                                                                        | 3,466,599 |
| 46 | 42 not 45                                                                                                                                                                       | 4,087     |

### Embase

| # | Searches                                                                                                                                         | Results |
|---|--------------------------------------------------------------------------------------------------------------------------------------------------|---------|
| 1 | exp *dementia/ or *alzheimer's disease/                                                                                                          | 177,994 |
| 2 | *cognitive impairment/                                                                                                                           | 40,861  |
| 3 | (dementia* or alzheimer*).ti.                                                                                                                    | 119,362 |
| 4 | ((mild* or early* or preclinical or pre-clinical) adj2 (cognitive impair* or cognitive dysfunction or cognitive decline)).ti.                    | 8,090   |
| 5 | 1 or 2 or 3 or 4                                                                                                                                 | 223,452 |
| 6 | exp *"quality of life"/                                                                                                                          | 80,143  |
| 7 | ("quality of life" or "quality of wellbeing" or "quality of well-being").ti.                                                                     | 76,232  |
| 8 | (qol or hqol or hrqol or hrql or hr-qol or hr-ql or euroqol or euro qol or eq5d or eq-5d or eq-vas or vas or whoqol or who qol or reqol*).ti,ab. | 129,834 |
| 9 | (sf6 or sf6d or sf12 or sf16 or sf20 or sf36).ti,ab.                                                                                             | 4,872   |

|    |                                                                                                                                                                                                                                                                                                                                                                                                                                                                                                                        |           |
|----|------------------------------------------------------------------------------------------------------------------------------------------------------------------------------------------------------------------------------------------------------------------------------------------------------------------------------------------------------------------------------------------------------------------------------------------------------------------------------------------------------------------------|-----------|
| 10 | ((sf or shortform or short-form) adj ("6" or 6d or "12" or "16" or "20" or "36" or six or twelve or sixteen or twenty or thirtysix or thirty six)).ti,ab.                                                                                                                                                                                                                                                                                                                                                              | 37,206    |
| 11 | (icepop or icecap* or duke health profile or dhp or core outcome measure? or core om).ti,ab.                                                                                                                                                                                                                                                                                                                                                                                                                           | 3,316     |
| 12 | (aaiqol or aai-qol or cdqlp or qolas or qolad or qol-ad or qold or dqol or demqol or adrql or adrql or oqold or oqolda or seiql or rsoc-qol or qualid or qualidem or qwb-sa or hsq-12 or zbi or zarit or ces-d or "activity and affect indicator*" or dcm or pwbcip or pwb-cip or np-i-d or ham-d or basquid or basqid or stai or stai-5 or bdi or gds or gps or hui or hui-ii or hui-iii or isd or pds or pes-ad or pesad or pes-ad-aes or pesadaes or ghq or cas or cbs or qwb or cbi or bsi or srb or phq-9).ti,ab. | 114,337   |
| 13 | (modified coop* or modified wonca* or "psychological well-being in cognitively impaired persons").ti,ab.                                                                                                                                                                                                                                                                                                                                                                                                               | 29        |
| 14 | *client satisfaction/ or *life satisfaction/                                                                                                                                                                                                                                                                                                                                                                                                                                                                           | 1,991     |
| 15 | ((life or patient* or carer? or caregiver? or spous* or wife or wives or husband?) adj satisfaction).ti.                                                                                                                                                                                                                                                                                                                                                                                                               | 8,839     |
| 16 | ((life or patient* or carer? or caregiver? or spous* or wife or wives or husband?) adj (experience? or preference? or perspective?)).ti.                                                                                                                                                                                                                                                                                                                                                                               | 11,228    |
| 17 | (wellbeing or well-being).ti.                                                                                                                                                                                                                                                                                                                                                                                                                                                                                          | 12,234    |
| 18 | ((life or patient* or carer? or caregiver? or spous* or wife or wives or husband?) adj (experience? or preference? or perspective?)).ti.                                                                                                                                                                                                                                                                                                                                                                               | 11,228    |
| 19 | caregiver time.ti,ab.                                                                                                                                                                                                                                                                                                                                                                                                                                                                                                  | 183       |
| 20 | 14 or 15 or 16 or 17 or 18 or 19                                                                                                                                                                                                                                                                                                                                                                                                                                                                                       | 33,365    |
| 21 | "surveys and questionnaires"/ or self report/                                                                                                                                                                                                                                                                                                                                                                                                                                                                          | 582,726   |
| 22 | (questionnaire? or survey?).ti,ab.                                                                                                                                                                                                                                                                                                                                                                                                                                                                                     | 1,011,521 |
| 23 | self report.ti,ab.                                                                                                                                                                                                                                                                                                                                                                                                                                                                                                     | 50,950    |
| 24 | ((patient* or carer? or caregiver? or spous* or wife or wives or husband? or proxy) adj report?).ti,ab.                                                                                                                                                                                                                                                                                                                                                                                                                | 10,383    |
| 25 | 21 or 22 or 23 or 24                                                                                                                                                                                                                                                                                                                                                                                                                                                                                                   | 1,187,376 |
| 26 | 20 and 25                                                                                                                                                                                                                                                                                                                                                                                                                                                                                                              | 14,705    |
| 27 | *caregiver burden/                                                                                                                                                                                                                                                                                                                                                                                                                                                                                                     | 1,934     |
| 28 | ((carer? or caregiver? or care or spous* or wife or wives or husband?) adj2 (burden* or cost?)).ti.                                                                                                                                                                                                                                                                                                                                                                                                                    | 6,435     |
| 29 | burden interview?.ti.                                                                                                                                                                                                                                                                                                                                                                                                                                                                                                  | 59        |
| 30 | "value of life".ti.                                                                                                                                                                                                                                                                                                                                                                                                                                                                                                    | 96        |
| 31 | *"activities of daily living"/                                                                                                                                                                                                                                                                                                                                                                                                                                                                                         | 8,385     |
| 32 | ("activities of daily living" or acdl or funtional status).ti.                                                                                                                                                                                                                                                                                                                                                                                                                                                         | 2,164     |
| 33 | *quality adjusted life year/                                                                                                                                                                                                                                                                                                                                                                                                                                                                                           | 1,084     |
| 34 | ("quality adjusted life years" or "disability adjusted life years" or qaly? or daly? or qald or qale or qtime or qaly).ti.                                                                                                                                                                                                                                                                                                                                                                                             | 898       |
| 35 | *Health Status/                                                                                                                                                                                                                                                                                                                                                                                                                                                                                                        | 28,930    |
| 36 | *sickness impact profile/                                                                                                                                                                                                                                                                                                                                                                                                                                                                                              | 689       |
| 37 | (standard gamble or "time trade off" or utility index or visual analog*).ti,ab.                                                                                                                                                                                                                                                                                                                                                                                                                                        | 64,774    |
| 38 | (health utilit* or disutilit* or utility value?).ti,ab.                                                                                                                                                                                                                                                                                                                                                                                                                                                                | 4,516     |
| 39 | health status.ti.                                                                                                                                                                                                                                                                                                                                                                                                                                                                                                      | 9,969     |
| 40 | 6 or 7 or 8 or 9 or 10 or 11 or 12 or 13 or 26 or 27 or 28 or 29 or 30 or 31 or 32 or 33 or 34 or 35 or 36 or 37 or 38 or 39                                                                                                                                                                                                                                                                                                                                                                                           | 393,955   |

|    |                                                                                                                                                                    |           |
|----|--------------------------------------------------------------------------------------------------------------------------------------------------------------------|-----------|
| 41 | 5 and 40                                                                                                                                                           | 6,763     |
| 42 | limit 41 to yr="1990 -Current"                                                                                                                                     | 6,613     |
| 43 | (editorial or letter or note or press).pt. or "phase 1 clinical trial (topic)" / or case report / or (case report or case study or letter? or editorial).ti.       | 4,421,368 |
| 44 | grounded theory / or exp qualitative research / or (qualitative research or qualitative study or qualitative interview* or grounded theory or hermeneutic*).ti,ab. | 71,138    |
| 45 | 43 or 44                                                                                                                                                           | 4,489,168 |
| 46 | 42 not 45                                                                                                                                                          | 6,122     |

### PsycINFO

| #  | Searches                                                                                                                                                                                                                                                                                                                                                                                                                                                                                                               | Results |
|----|------------------------------------------------------------------------------------------------------------------------------------------------------------------------------------------------------------------------------------------------------------------------------------------------------------------------------------------------------------------------------------------------------------------------------------------------------------------------------------------------------------------------|---------|
| 1  | exp *dementia / or *alzheimer's disease /                                                                                                                                                                                                                                                                                                                                                                                                                                                                              | 58,737  |
| 2  | *cognitive impairment /                                                                                                                                                                                                                                                                                                                                                                                                                                                                                                | 23,977  |
| 3  | (dementia* or alzheimer*).ti.                                                                                                                                                                                                                                                                                                                                                                                                                                                                                          | 47,312  |
| 4  | ((mild* or early* or preclinical or pre-clinical) adj2 (cognitive impair* or cognitive dysfunction or cognitive decline)).ti.                                                                                                                                                                                                                                                                                                                                                                                          | 3,675   |
| 5  | 1 or 2 or 3 or 4                                                                                                                                                                                                                                                                                                                                                                                                                                                                                                       | 77,854  |
| 6  | exp *"quality of life" /                                                                                                                                                                                                                                                                                                                                                                                                                                                                                               | 28,944  |
| 7  | ("quality of life" or "quality of wellbeing" or "quality of well-being").ti.                                                                                                                                                                                                                                                                                                                                                                                                                                           | 17,544  |
| 8  | (qol or hqol or hrqol or hrql or hr-qol or hr-ql or euroqol or euro qol or eq5d or eq-5d or eq-vas or vas or whoqol or who qol or reqol*).ti,ab.                                                                                                                                                                                                                                                                                                                                                                       | 15,758  |
| 9  | (sf6 or sf6d or sf12 or sf16 or sf20 or sf36).ti,ab.                                                                                                                                                                                                                                                                                                                                                                                                                                                                   | 243     |
| 10 | ((sf or shortform or short-form) adj ("6" or 6d or "12" or "16" or "20" or "36" or six or twelve or sixteen or twenty or thirtysix or thirty six)).ti,ab.                                                                                                                                                                                                                                                                                                                                                              | 5,546   |
| 11 | (icepop or icecap* or duke health profile or dhp or core outcome measure? or core om).ti,ab.                                                                                                                                                                                                                                                                                                                                                                                                                           | 367     |
| 12 | (aaiqol or aai-qol or cdqlp or qolas or qolad or qol-ad or qold or dqol or demqol or adrql or adrql or oqold or oqolda or seiql or rsoc-qol or qualid or qualidem or qwb-sa or hsq-12 or zbi or zarit or ces-d or "activity and affect indicator*" or dcm or pwbcip or pwb-cip or np-i-d or ham-d or basquid or basqid or stai or stai-5 or bdi or gds or gps or hui or hui-ii or hui-iii or isd or pds or pes-ad or pesad or pes-ad-aes or pesadaes or ghq or cas or cbs or qwb or cbi or bsi or srb or phq-9).ti,ab. | 27,360  |
| 13 | (modified coop* or modified wonca* or "psychological well-being in cognitively impaired persons").ti,ab.                                                                                                                                                                                                                                                                                                                                                                                                               | 14      |
| 14 | *client satisfaction / or *life satisfaction /                                                                                                                                                                                                                                                                                                                                                                                                                                                                         | 10,500  |
| 15 | ((life or patient* or carer? or caregiver? or spous* or wife or wives or husband?) adj satisfaction).ti.                                                                                                                                                                                                                                                                                                                                                                                                               | 4,378   |
| 16 | ((life or patient* or carer? or caregiver? or spous* or wife or wives or husband?) adj (experience? or preference? or perspective?)).ti.                                                                                                                                                                                                                                                                                                                                                                               | 3,089   |
| 17 | (wellbeing or well-being).ti.                                                                                                                                                                                                                                                                                                                                                                                                                                                                                          | 17,565  |
| 18 | ((life or patient* or carer? or caregiver? or spous* or wife or wives or husband?) adj (experience? or preference? or perspective?)).ti.                                                                                                                                                                                                                                                                                                                                                                               | 3,089   |
| 19 | caregiver time.ti,ab.                                                                                                                                                                                                                                                                                                                                                                                                                                                                                                  | 51      |



|    |                                                                                                                                                              |         |
|----|--------------------------------------------------------------------------------------------------------------------------------------------------------------|---------|
| 20 | 14 or 15 or 16 or 17 or 18 or 19                                                                                                                             | 30,716  |
| 21 | questionnaires/ or surveys/ or self report/                                                                                                                  | 36,535  |
| 22 | (questionnaire? or survey?).ti,ab.                                                                                                                           | 409,092 |
| 23 | self report.ti,ab.                                                                                                                                           | 49,405  |
| 24 | ((patient* or carer? or caregiver? or spous* or wife or wives or husband? or proxy) adj report?).ti,ab.                                                      | 2,724   |
| 25 | 21 or 22 or 23 or 24                                                                                                                                         | 446,678 |
| 26 | 20 and 25                                                                                                                                                    | 10,093  |
| 27 | *caregiver burden/                                                                                                                                           | 4,122   |
| 28 | ((carer? or caregiver? or care or spous* or wife or wives or husband?) adj2 (burden* or cost?)).ti.                                                          | 1,257   |
| 29 | burden interview?.ti.                                                                                                                                        | 42      |
| 30 | "value of life".ti.                                                                                                                                          | 33      |
| 31 | *"activities of daily living"/                                                                                                                               | 3,835   |
| 32 | ("activities of daily living" or acdl or funtional status).ti.                                                                                               | 734     |
| 33 | ("quality adjusted life years" or "disability adjusted life years" or qaly? or daly? or qald or qale or qtime or qaly).ti.                                   | 142     |
| 34 | (standard gamble or "time trade off" or utility index or visual analog*).ti,ab.                                                                              | 6,195   |
| 35 | (health utilit* or disutilit* or utility value?).ti,ab.                                                                                                      | 877     |
| 36 | health status.ti.                                                                                                                                            | 2,312   |
| 37 | 6 or 7 or 8 or 9 or 10 or 11 or 12 or 13 or 26 or 27 or 28 or 29 or 30 or 31 or 32 or 33 or 34 or 35 or 36                                                   | 85,145  |
| 38 | 5 and 37                                                                                                                                                     | 4,392   |
| 39 | limit 38 to yr="1990 -Current"                                                                                                                               | 4,344   |
| 40 | case report/ or (case report or case study or letter? or editorial).ti.                                                                                      | 62,005  |
| 41 | grounded theory/ or qualitative research/ or (qualitative research or qualitative study or qualitative interview* or grounded theory or hermeneutic*).ti,ab. | 61,499  |
| 42 | 40 or 41                                                                                                                                                     | 122,316 |
| 43 | 39 not 42                                                                                                                                                    | 4,208   |

*Cochrane Database of Systematic Reviews, Cochrane Central Register of Controlled Trials, Database Abstract of Reviews of Effects, NHS Economic Evaluation Database*

| ID | Search                                                                                                                                                                                |
|----|---------------------------------------------------------------------------------------------------------------------------------------------------------------------------------------|
| #1 | MeSH descriptor: [Dementia] explode all trees                                                                                                                                         |
| #2 | MeSH descriptor: [Mild Cognitive Impairment] explode all trees                                                                                                                        |
| #3 | dementia* or alzheimer*:ti (Word variations have been searched)                                                                                                                       |
| #4 | ((mild* or early* or preclinical or pre-clinical) near/2 (cognitive impair* or cognitive dysfunction or cognitive decline)):ti (Word variations have been searched)                   |
| #5 | #1 or #2 or #3 or #4                                                                                                                                                                  |
| #6 | MeSH descriptor: [Quality of Life] explode all trees                                                                                                                                  |
| #7 | quality of life or "quality of wellbeing" or "quality of well-being":ti (Word variations have been searched)                                                                          |
| #8 | qol or hqol or hrqol or hrql or hr-qol or hr-ql or euroqol or euro qol or eq5d or eq-5d or eq-vas or vas or whoqol or who qol or reqol*:ti,ab,kw (Word variations have been searched) |



|     |                                                                                                                                                                                                                                                                                                                                                                                                                                                                                                                                                            |
|-----|------------------------------------------------------------------------------------------------------------------------------------------------------------------------------------------------------------------------------------------------------------------------------------------------------------------------------------------------------------------------------------------------------------------------------------------------------------------------------------------------------------------------------------------------------------|
| #9  | sf6 or sf6d or sf12 or sf16 or sf20 or sf36:ti,ab,kw (Word variations have been searched)                                                                                                                                                                                                                                                                                                                                                                                                                                                                  |
| #10 | ((sf or shortform or short-form) next ("6" or 6d or "12" or "16" or "20" or "36" or six or twelve or sixteen or twenty or thirtysix or thirty six)):ti,ab,kw (Word variations have been searched)                                                                                                                                                                                                                                                                                                                                                          |
| #11 | icepop or icecap* or "duke health profile" or dhp or "core outcome measure?" or "core om":ti,ab,kw (Word variations have been searched)                                                                                                                                                                                                                                                                                                                                                                                                                    |
| #12 | aaiqol or aai-qol or cdqlp or qolas or qolad or qol-ad or qold or dqol or demqol or adrql or adrql or oqold or oqolda or seiql or rsoc-qol or qualid or qualidem or qwb-sa or hsq-12 or zbi or zarit or ces-d or "activity and affect indicator*" or dcm or pwbcip or pwb-cip or npi-d or ham-d or basquid or basqid or stai or stai-5 or bdi or gds or gps or hui or hui-ii or hui-iii or isd or pds or pes-ad or pesad or pes-ad-aes or pesadaes or ghq or cas or cbs or qwb or cbi or bsi or srb or phq-9:ti,ab,kw (Word variations have been searched) |
| #13 | modified coop* or "modified wonca*" or "psychological well-being in cognitively impaired persons":ti,ab,kw (Word variations have been searched)                                                                                                                                                                                                                                                                                                                                                                                                            |
| #14 | MeSH descriptor: [Patient Satisfaction] this term only                                                                                                                                                                                                                                                                                                                                                                                                                                                                                                     |
| #15 | MeSH descriptor: [Personal Satisfaction] explode all trees                                                                                                                                                                                                                                                                                                                                                                                                                                                                                                 |
| #16 | ((life or patient* or carer? or caregiver? or spous* or wife or wives or husband?) next satisfaction):ti,ab,kw (Word variations have been searched)                                                                                                                                                                                                                                                                                                                                                                                                        |
| #17 | ((life or patient* or carer? or caregiver? or spous* or wife or wives or husband?) next (experience? or preference? or perspective?)):ti,ab,kw (Word variations have been searched)                                                                                                                                                                                                                                                                                                                                                                        |
| #18 | wellbeing or well-being:ti (Word variations have been searched)                                                                                                                                                                                                                                                                                                                                                                                                                                                                                            |
| #19 | ((life or patient* or carer? or caregiver? or spous* or wife or wives or husband?) next (experience? or preference? or perspective?)):ti,ab,kw (Word variations have been searched)                                                                                                                                                                                                                                                                                                                                                                        |
| #20 | caregiver time:ti,ab,kw (Word variations have been searched)                                                                                                                                                                                                                                                                                                                                                                                                                                                                                               |
| #21 | ((carer? or caregiver? or care or spous* or wife or wives or husband?) near/2 (burden* or cost?)):ti,ab,kw (Word variations have been searched)                                                                                                                                                                                                                                                                                                                                                                                                            |
| #22 | burden interview?:ti,ab,kw (Word variations have been searched)                                                                                                                                                                                                                                                                                                                                                                                                                                                                                            |
| #23 | value of life:ti,ab,kw (Word variations have been searched)                                                                                                                                                                                                                                                                                                                                                                                                                                                                                                |
| #24 | MeSH descriptor: [Activities of Daily Living] explode all trees                                                                                                                                                                                                                                                                                                                                                                                                                                                                                            |
| #25 | activities of daily living or acdl or "functional status":ti,ab,kw (Word variations have been searched)                                                                                                                                                                                                                                                                                                                                                                                                                                                    |
| #26 | MeSH descriptor: [Quality-Adjusted Life Years] explode all trees                                                                                                                                                                                                                                                                                                                                                                                                                                                                                           |
| #27 | quality adjusted life years or "disability adjusted life years" or qaly? or daly? or qald or qale or qtime or qaly:ti,ab,kw (Word variations have been searched)                                                                                                                                                                                                                                                                                                                                                                                           |
| #28 | MeSH descriptor: [Health Status] this term only                                                                                                                                                                                                                                                                                                                                                                                                                                                                                                            |
| #29 | MeSH descriptor: [Sickness Impact Profile] explode all trees                                                                                                                                                                                                                                                                                                                                                                                                                                                                                               |
| #30 | standard gamble or "time trade off" or "utility index" or "visual analog*":ti,ab,kw (Word variations have been searched)                                                                                                                                                                                                                                                                                                                                                                                                                                   |
| #31 | health utilit* or disutilit* or "utility value?":ti,ab,kw (Word variations have been searched)                                                                                                                                                                                                                                                                                                                                                                                                                                                             |
| #32 | HEALTH STATUS:ti (Word variations have been searched)                                                                                                                                                                                                                                                                                                                                                                                                                                                                                                      |
| #33 | #6 or #7 or #8 or #9 or #10 or #11 or #12 or #13 or #14 or #15 or #16 or #17 or #18 or #19 or #20 or #21 or #22 or #23 or #24 or #25 or #26 or #27 or #28 or #29 or #30 or #31 or #32                                                                                                                                                                                                                                                                                                                                                                      |
| #34 | #5 and #33                                                                                                                                                                                                                                                                                                                                                                                                                                                                                                                                                 |

## Supplementary file 3: Data extraction form

## QoL Data Extraction Form

|                                                                                                               |  |
|---------------------------------------------------------------------------------------------------------------|--|
| Study ID ( <i>surname of first author and year first full report of study was published e.g. Smith 2001</i> ) |  |
| Publication Title                                                                                             |  |
| Notes:                                                                                                        |  |

### General Information

|                                                       |  |
|-------------------------------------------------------|--|
| Date when form was completed ( <i>dd/mm/yyyy</i> )    |  |
| Name of person extracting data                        |  |
| Language of study                                     |  |
| Corresponding author contact details                  |  |
| Publication type (e.g. full report, abstract, letter) |  |
| Notes:                                                |  |

### Study Design

|                   | Descriptions as stated in the study                                                                                                                                                                                                                                                                                                                                                                                                                                                                                                                                                                                                                        |
|-------------------|------------------------------------------------------------------------------------------------------------------------------------------------------------------------------------------------------------------------------------------------------------------------------------------------------------------------------------------------------------------------------------------------------------------------------------------------------------------------------------------------------------------------------------------------------------------------------------------------------------------------------------------------------------|
| Aim of the study  |                                                                                                                                                                                                                                                                                                                                                                                                                                                                                                                                                                                                                                                            |
| Type of study     | Interventional study: <ul style="list-style-type: none"> <li>Randomised controlled trial <input type="checkbox"/></li> <li>Non-randomised controlled trial <input type="checkbox"/></li> <li>Cross-over randomised controlled trial <input type="checkbox"/></li> <li>Before-and-after study <input type="checkbox"/></li> </ul> Observational study: <ul style="list-style-type: none"> <li>Case-control study <input type="checkbox"/></li> <li>Cohort study <input type="checkbox"/></li> <li>Cross-sectional study <input type="checkbox"/></li> <li>Other (specify):</li> </ul> Register based study <input type="checkbox"/> Other design (specify): |
| Type of analysis  | Prospective <input type="checkbox"/><br>Retrospective <input type="checkbox"/><br>Unclear <input type="checkbox"/>                                                                                                                                                                                                                                                                                                                                                                                                                                                                                                                                         |
| QoL instrument(s) |                                                                                                                                                                                                                                                                                                                                                                                                                                                                                                                                                                                                                                                            |

|                                                                                                        |                                                                                           |
|--------------------------------------------------------------------------------------------------------|-------------------------------------------------------------------------------------------|
| QoL instrument language                                                                                |                                                                                           |
| QoL instrument mode of administration (e.g. paper copy; electronic; telephone; face-to-face interview) |                                                                                           |
| Outcomes measured other than QoL?                                                                      |                                                                                           |
| Start date                                                                                             |                                                                                           |
| End date                                                                                               |                                                                                           |
| Follow up (in months)                                                                                  |                                                                                           |
| Ethical approval needed/ obtained for study                                                            | <input type="checkbox"/> Yes <input type="checkbox"/> No <input type="checkbox"/> Unclear |

### Participants

|                                               |                                                                                                                                                                                                                                                                                                                           |
|-----------------------------------------------|---------------------------------------------------------------------------------------------------------------------------------------------------------------------------------------------------------------------------------------------------------------------------------------------------------------------------|
|                                               | Description as stated in paper/report                                                                                                                                                                                                                                                                                     |
| Country (ies)                                 |                                                                                                                                                                                                                                                                                                                           |
| Population Description                        |                                                                                                                                                                                                                                                                                                                           |
| Type of Participant                           | Patients <input type="checkbox"/><br>Caregivers <input type="checkbox"/><br>Other: ..... <input type="checkbox"/>                                                                                                                                                                                                         |
| Setting                                       | Community <input type="checkbox"/><br>Institutional <input type="checkbox"/><br>Primary Care <input type="checkbox"/><br>Secondary Care <input type="checkbox"/><br>Tertiary Care <input type="checkbox"/><br>Mixed <input type="checkbox"/><br>Unclear <input type="checkbox"/><br>Other: ..... <input type="checkbox"/> |
| <b>Enrolment Eligibility</b>                  |                                                                                                                                                                                                                                                                                                                           |
| A. Inclusion Criteria                         | A.                                                                                                                                                                                                                                                                                                                        |
| B. Exclusion Criteria                         | B.                                                                                                                                                                                                                                                                                                                        |
| Recruitment Process                           |                                                                                                                                                                                                                                                                                                                           |
| Sample Size                                   |                                                                                                                                                                                                                                                                                                                           |
| Mean age of patients                          |                                                                                                                                                                                                                                                                                                                           |
| Patients gender (% of females in the sample)  |                                                                                                                                                                                                                                                                                                                           |
| Mean age of caregiver                         |                                                                                                                                                                                                                                                                                                                           |
| Caregiver gender (% of females in the sample) |                                                                                                                                                                                                                                                                                                                           |
| Caregiver relationship to patient             | Spouse _____%    Daughter/son-in-law _____%<br>Daughter _____%    Grandchild _____%                                                                                                                                                                                                                                       |

|                                                 |                |                         |
|-------------------------------------------------|----------------|-------------------------|
|                                                 | Son _____%     | Friend _____%           |
|                                                 | Brother _____% | Other: _____ and _____% |
|                                                 | Sister _____%  |                         |
| Any other relevant sociodemographic information |                |                         |
| Notes:                                          |                |                         |

**Dementia Diagnosis**

|                                | Description as stated in paper/report                                                                                                                                                                                                                                                                                                          |
|--------------------------------|------------------------------------------------------------------------------------------------------------------------------------------------------------------------------------------------------------------------------------------------------------------------------------------------------------------------------------------------|
| Type of Dementia               | Alzheimer’s Disease <input type="checkbox"/><br>Lewy Body Dementia <input type="checkbox"/><br>Vascular Dementia <input type="checkbox"/><br>Mixed <input type="checkbox"/><br>Other: ..... <input type="checkbox"/>                                                                                                                           |
| Disease Severity               | Pre-clinical dementia <input type="checkbox"/><br>Early symptoms <input type="checkbox"/><br>MCI <input type="checkbox"/><br>Prodromal AD <input type="checkbox"/><br>Mild dementia <input type="checkbox"/><br>Moderate dementia <input type="checkbox"/><br>Severe dementia <input type="checkbox"/><br>End of Life <input type="checkbox"/> |
| Assessment of Disease Severity | Tool Used: .....<br>Details:                                                                                                                                                                                                                                                                                                                   |
| Notes                          |                                                                                                                                                                                                                                                                                                                                                |

**Interventions**

|                                 | Description as stated in paper/report |                    |
|---------------------------------|---------------------------------------|--------------------|
| Type of Intervention            |                                       |                    |
| Timing of Intervention          |                                       |                    |
| Duration of Intervention Period |                                       |                    |
| No. of people in each group     | Comparison Group                      | Intervention Group |
|                                 |                                       |                    |
| Implementation                  |                                       |                    |

**Outcomes**

|                 | Description as stated in paper/report |
|-----------------|---------------------------------------|
| Outcome Measure |                                       |

|                                                                            |                                                                                                                                                                                                  |
|----------------------------------------------------------------------------|--------------------------------------------------------------------------------------------------------------------------------------------------------------------------------------------------|
| Time Points Measured                                                       | Single Time Point Only <input type="checkbox"/><br>Baseline <input type="checkbox"/><br>Follow Up – Details: ..... <input type="checkbox"/>                                                      |
| Group Measured                                                             | Patient <input type="checkbox"/> Caregiver <input type="checkbox"/>                                                                                                                              |
| Source ( <i>who the information on outcome measured is obtained from</i> ) | Patient <input type="checkbox"/><br>Caregiver <input type="checkbox"/><br>Clinician <input type="checkbox"/><br>General public <input type="checkbox"/><br>Other: ..... <input type="checkbox"/> |
| Tool Used                                                                  |                                                                                                                                                                                                  |
| Details                                                                    | Score Range: .....                                                                                                                                                                               |
| Outcome tool validated                                                     | Yes <input type="checkbox"/> No <input type="checkbox"/> Unclear <input type="checkbox"/>                                                                                                        |
| Notes                                                                      |                                                                                                                                                                                                  |

### Results

| Results                                         | Description as stated in paper/report |                |           |              |               |                   |                 |             |       |
|-------------------------------------------------|---------------------------------------|----------------|-----------|--------------|---------------|-------------------|-----------------|-------------|-------|
|                                                 | Pre-clinical                          | Early symptoms | MCI       | Prodromal AD | Mild dementia | Moderate dementia | Severe dementia | End of Life | Total |
| Patients' QoL:<br>A. Baseline<br>B. Follow-up   |                                       |                |           |              |               |                   |                 |             |       |
| Caregivers' QoL:<br>A. Baseline<br>B. Follow-up |                                       |                |           |              |               |                   |                 |             |       |
| Comparison Group:                               | Baseline                              |                | Follow Up |              | Effect Size   |                   | 95% CIs         |             |       |
|                                                 |                                       |                |           |              |               |                   |                 |             |       |
| Intervention Group                              | Baseline                              |                | Follow Up |              | Effect Size   |                   | 95% CIs         |             |       |
|                                                 |                                       |                |           |              |               |                   |                 |             |       |
| Statistical Analysis                            |                                       |                |           |              |               |                   |                 |             |       |
| Conclusion                                      |                                       |                |           |              |               |                   |                 |             |       |
| Any other results reported?                     |                                       |                |           |              |               |                   |                 |             |       |

**Conclusions**

|                                                                                           | Description as stated in paper/report |
|-------------------------------------------------------------------------------------------|---------------------------------------|
| Author's conclusions                                                                      |                                       |
| Reviewer's conclusions                                                                    |                                       |
| Correspondence required for further study information ( <i>from whom, what and when</i> ) |                                       |
| Notes                                                                                     |                                       |

# BMJ Open

## Measuring quality of life of people with pre-dementia and dementia and their caregivers: a systematic review protocol

|                                 |                                                                                                                                                                                                                                                                                                                                                                                                                                                                                                                                                                                                                                                                                                                                                                                                                                                                                                                                                                                                                                                                                                                                                                                                                                                                                                                                                                                                                              |
|---------------------------------|------------------------------------------------------------------------------------------------------------------------------------------------------------------------------------------------------------------------------------------------------------------------------------------------------------------------------------------------------------------------------------------------------------------------------------------------------------------------------------------------------------------------------------------------------------------------------------------------------------------------------------------------------------------------------------------------------------------------------------------------------------------------------------------------------------------------------------------------------------------------------------------------------------------------------------------------------------------------------------------------------------------------------------------------------------------------------------------------------------------------------------------------------------------------------------------------------------------------------------------------------------------------------------------------------------------------------------------------------------------------------------------------------------------------------|
| Journal:                        | <i>BMJ Open</i>                                                                                                                                                                                                                                                                                                                                                                                                                                                                                                                                                                                                                                                                                                                                                                                                                                                                                                                                                                                                                                                                                                                                                                                                                                                                                                                                                                                                              |
| Manuscript ID                   | bmjopen-2017-019082.R1                                                                                                                                                                                                                                                                                                                                                                                                                                                                                                                                                                                                                                                                                                                                                                                                                                                                                                                                                                                                                                                                                                                                                                                                                                                                                                                                                                                                       |
| Article Type:                   | Protocol                                                                                                                                                                                                                                                                                                                                                                                                                                                                                                                                                                                                                                                                                                                                                                                                                                                                                                                                                                                                                                                                                                                                                                                                                                                                                                                                                                                                                     |
| Date Submitted by the Author:   | 03-Jan-2018                                                                                                                                                                                                                                                                                                                                                                                                                                                                                                                                                                                                                                                                                                                                                                                                                                                                                                                                                                                                                                                                                                                                                                                                                                                                                                                                                                                                                  |
| Complete List of Authors:       | <p>Landeiro, Filipa; University of Oxford, Nuffield Department of Population Health</p> <p>Walsh, Katie; University of Oxford, Nuffield Department of Population Health, Health Economics Research Centre</p> <p>Ghinai, Isaac; University of Oxford Health Economics Research Centre</p> <p>Mughal, Seher; University of Oxford Health Economics Research Centre</p> <p>Nye, Elsbeth; University of Oxford Health Economics Research Centre</p> <p>Wace, Helena; University of Oxford , Nuffield Department of Population Health, Health Economics Research Centre</p> <p>Roberts, Nia; University of Oxford, UK, Bodleian Health Care Libraries, Lecomte, Pascal; Novartis AG</p> <p>Wittenberg, Raphael; London School of Economics and Political Science, Personal Social Services Research Unit</p> <p>Wolstenholme, Jane; University of Oxford, Department of Public Health</p> <p>Handels, Ron; Maastricht University, Alzheimer Centre Limburg, Department of Psychiatry and Neuropsychology, School of Mental Health and Neurosciences; Karolinska Institute, Department of Neurobiology, Care Science and Society, Division of Neurogeriatrics</p> <p>Roncancio-Diaz, Emilse; GE Healthcare, Life Sciences</p> <p>Potashman, Michele; Biogen, Value and Access</p> <p>Tockhorn-Heidenreich, Antje; Eli Lilly and Company</p> <p>Gray, Alastair; University of Oxford, Nuffield Department of Population Health</p> |
| <b>Primary Subject Heading</b>: | Geriatric medicine                                                                                                                                                                                                                                                                                                                                                                                                                                                                                                                                                                                                                                                                                                                                                                                                                                                                                                                                                                                                                                                                                                                                                                                                                                                                                                                                                                                                           |
| Secondary Subject Heading:      | Health economics, Mental health, Neurology, Public health                                                                                                                                                                                                                                                                                                                                                                                                                                                                                                                                                                                                                                                                                                                                                                                                                                                                                                                                                                                                                                                                                                                                                                                                                                                                                                                                                                    |
| Keywords:                       | Dementia < NEUROLOGY, Alzheimer's disease, quality of life, Systematic literature review, Utility                                                                                                                                                                                                                                                                                                                                                                                                                                                                                                                                                                                                                                                                                                                                                                                                                                                                                                                                                                                                                                                                                                                                                                                                                                                                                                                            |
|                                 |                                                                                                                                                                                                                                                                                                                                                                                                                                                                                                                                                                                                                                                                                                                                                                                                                                                                                                                                                                                                                                                                                                                                                                                                                                                                                                                                                                                                                              |

SCHOLARONE™  
Manuscripts

1  
2  
3 **Measuring quality of life of people with pre-dementia and dementia and their caregivers: a**  
4 **systematic review protocol**  
5

6  
7 Filipa Landeiro, Katie Walsh, Isaac Ghinai, Seher Mughal, Elsbeth Nye, Helena Wace, Nia  
8  
9 Roberts, Pascal Lecomte, Raphael Wittenberg, Jane Wolstenholme, Ron Handels, Emilse  
10  
11 Roncancio-Diaz, Michele H. Potashman, Antje Tockhorn-Heidenreich, Alastair M. Gray, on  
12  
13 behalf of the ROADMAP Group  
14

15  
16  
17 Filipa Landeiro, Senior Researcher in Health Economics, Health Economics Research Centre,  
18  
19 Nuffield Department of Population Health, Old Road Campus, University of Oxford, Oxford,  
20  
21 OX3 7LF, UK  
22

23  
24 Katie Walsh, Foundation Doctor, Health Economics Research Centre, Nuffield Department of  
25  
26 Population Health, Old Road Campus, University of Oxford, Oxford, OX3 7LF, UK  
27

28  
29 Isaac Ghinai, Academic Clinical Fellow, Health Economics Research Centre, Nuffield  
30  
31 Department of Population Health, Old Road Campus, University of Oxford, Oxford, OX3 7LF, UK  
32

33  
34 Seher Mughal, Health Economics Research Centre, Nuffield Department of Population Health,  
35  
36 Old Road Campus, University of Oxford, Oxford, OX3 7LF, UK  
37

38  
39 Elsbeth Nye, Foundation Doctor, Health Economics Research Centre, Nuffield Department of  
40  
41 Population Health, Old Road Campus, University of Oxford, Oxford, OX3 7LF, UK  
42

43  
44 Helena Wace, Foundation Doctor, Health Economics Research Centre, Nuffield Department of  
45  
46 Population Health, Old Road Campus, University of Oxford, Oxford, OX3 7LF, UK  
47

48  
49 Nia Roberts, Information Specialist, Bodleian Health Care Libraries, Old Road Campus,  
50  
51 University of Oxford, Oxford, OX3 7LF, UK  
52

53  
54 Pascal Lecomte, Global Head Health Economic Modelling and Methodology, Novartis Pharma  
55  
56 AG, 4002 Basel, Switzerland  
57

58  
59 Raphael Wittenberg, Associate Professorial Research Fellow, Personal Social Services Research  
60  
Unit, London School of Economics and Political Science, Houghton Street, London WC2A 2AE,  
1



1  
2  
3 UK

4 Jane Wolstenholme, Senior Health Economist, Health Economics Research Centre, Nuffield  
5 Department of Population Health, Old Road Campus, University of Oxford, Oxford, OX3 7LF, UK  
6

7  
8 Ron Handels, Researcher, Alzheimer Centre Limburg, Department of Psychiatry and  
9 Neuropsychology, School for Mental Health and Neurosciences, Maastricht University,  
10 Maastricht, The Netherlands, and Department of Neurobiology, Care Science and Society,  
11 Division of Neurogeriatrics, Karolinska Institute, Stockholm, Sweden  
12

13 Emilse Roncancio-Diaz, Health Economics and Outcomes Research Manager, Life Sciences, GE  
14 Healthcare, White Lion Rd, Little Chalfont, Amersham HP7 9LL, UK  
15

16 Michele H. Potashman, Associate Director, Value and Access, Biogen, 225 Binney St,  
17 Cambridge MA 02139, USA  
18

19 Antje Tockhorn-Heidenreich, Senior Research Scientist, Eli Lilly and Company, Erl Wood Manor,  
20 Windlesham, GU20 6PH, UK  
21

22 Alastair M. Gray, Professor of Health Economics, Health Economics Research Centre, Nuffield  
23 Department of Population Health, Old Road Campus, University of Oxford, Oxford, OX3 7LF, UK  
24

25  
26  
27  
28  
29  
30  
31  
32  
33  
34  
35  
36 Correspondence to: Filipa Landeiro [filipa.landeiro@dph.ox.ac.uk](mailto:filipa.landeiro@dph.ox.ac.uk)  
37  
38  
39  
40  
41  
42  
43  
44  
45  
46  
47  
48  
49  
50  
51  
52  
53  
54  
55  
56  
57  
58  
59  
60

**Abstract**

**Introduction:** Dementia is the fastest growing major cause of disability globally and may have a profound impact on the health-related quality of life (HRQoL) of both the patient with dementia and those who care for them. This review aims to systematically identify and synthesize the measurements of HRQoL for people with and their caregivers across the full spectrum of dementia, from its preceding stage of pre-dementia to end of life.

**Methods and analysis:** A systematic literature review was conducted in MEDLINE, Embase, CDSR, CENTRAL, DARE, NHS EED, and PsycINFO between January 1990 and the end of April 2017. Two reviewers will independently assess each study for inclusion and disagreements will be resolved by a third reviewer. Data will be extracted using a pre-defined data extraction form following best practice. Study quality will be assessed with the Effective Public Health Practice Project quality assessment tool. HRQoL measurements will be presented separately for people with dementia and caregivers by instrument used and, when possible, HRQoL will be reported by disease type and stage of the disease. Descriptive statistics of the results will be provided. A narrative synthesis of studies will also be provided discussing differences in HRQoL measurements by instrument used to estimate it, type of dementia and disease severity.

**Ethics and Dissemination:** This systematic literature review is exempt from ethics approval because the work is carried out on published documents. The findings of the review will be disseminated in a related peer-reviewed journal and presented at conferences. They will also contribute to the work developed in the Real World Outcomes across the Alzheimer's disease spectrum for better care: multi-modal data access platform (ROADMAP).

**Trial registration number:** CRD42017071416

**Keywords:** dementia, Alzheimer's disease, patient, caregiver, carer, quality of life, systematic review, utility

### Strengths of study

- This systematic literature review on quality of life of people with pre-dementia and dementia and their caregivers is based on a detailed search strategy including studies from any country published in any language, covering the time frame from 1<sup>st</sup> January 1990 until 28<sup>th</sup> April 2017.
- The review follows robust guidelines and the quality of the papers included will be assessed using a validated tool.

### Limitations of study

- The heterogeneity in the way quality of life is measured and reported may not allow for direct comparisons between studies.

### Introduction

Dementia is a global disease with little prospect of a cure or means of preventing its progression. In 2014, it was estimated to affect 7.1% of people aged 65 and above worldwide<sup>1</sup>. It is a debilitating neurodegenerative condition which causes a progressive and irreversible decline in cognitive, social and physical function. There are several types of dementia and some people may present with a combination of types. Alzheimer's disease (AD) is the most common cause of dementia, accounting for 60-80% of all cases<sup>2</sup>. Other causes include vascular dementia (VaD), frontotemporal dementia (FTD), dementia with Lewy bodies (DLB) and others. Irrespective of the cause, dementia results in significant decline in intellectual abilities, such as memory, and causes behavioural changes, insight and judgement, anxiety and depression, with eventual loss of physical functions and personality. This eventually becomes severe enough to interfere with a person's daily functioning and activities of daily living (ADLs).

1  
2  
3 The cognitive and functional decline associated with dementia has a profound impact on the  
4 health-related quality of life (HRQoL) of both the patient and those that care for them. HRQoL,  
5 defined as the way health is empirically estimated to affect QoL, is a multi-dimensional  
6 concept that includes domains related to physical, mental, emotional and social functioning.  
7 HRQoL is now recognised as an increasingly valued health outcome measure in dementia. With  
8 no cure, the focus of attention in dementia care is to promote patient well-being and to  
9 maintain optimal HRQoL. As HRQoL refers to all aspects of a person's life it can provide  
10 valuable information on the patient's self-perception of health and intervention impact.  
11 HRQoL measures attempt to evaluate directly the impact of dementia or interventions on  
12 people's ability to function in life. They have therefore become a key way in which to assess  
13 the effectiveness of health and social service interventions.  
14  
15  
16  
17  
18  
19  
20  
21  
22  
23  
24  
25  
26  
27

28 Dementia patients require long term care and support and the responsibility for caregiving  
29 most often falls upon informal caregivers including family members, friends and neighbours.  
30 These caregivers provide a valuable resource for dementia patients. There are over 700,000  
31 informal caregivers of people with dementia estimated to be providing £12.4 billion of unpaid  
32 care in the UK per year<sup>3</sup>. The work of these caregivers is vital to support the growing number  
33 of people affected by dementia and without them the formal care system would likely  
34 collapse. The National Dementia Strategy for England<sup>4</sup> recognises this and supporting  
35 caregivers is now a national and international policy priority<sup>5</sup>.  
36  
37  
38  
39  
40  
41  
42  
43  
44  
45  
46

47 Given that caregivers of people with dementia are considered to be such an important  
48 resource, it is important to ensure that their own HRQoL is satisfactory. For many, the  
49 experience of caring for their loved ones provides personal satisfaction. However, the  
50 experience can also have a negative impact. Caregivers often have high levels of anxiety, stress  
51 and depression<sup>6</sup> as caring for people with dementia often places a heavy mental, physical,  
52  
53  
54  
55  
56  
57  
58  
59  
60

1  
2  
3 financial, and social burden on them<sup>7-11</sup>. Great demands are placed on caregivers who are  
4 often elderly themselves<sup>8,9</sup>. As a result caregivers might find themselves neglecting their own  
5 health and HRQoL. This could ultimately impact on the quality of the care that they provide for  
6 people with dementia. Therefore, addressing caregivers' HRQoL is an important challenge.  
7  
8  
9

10  
11  
12  
13 Shearer et al.<sup>10</sup> conducted a systematic review of the literature on health value states for AD  
14 patients and their caregivers based on generic preference-based instruments<sup>10</sup>. Two recently  
15 published systematic reviews examined the factors associated with the HRQoL of dementia  
16 patients, either in all types of setting<sup>12</sup> or in long-term care facilities in particular<sup>13</sup>. A few  
17 reviews have identified HRQoL measures for dementia patients and their carers<sup>14-16</sup>. Caregiver  
18 burden has also been explored in a few systematic reviews, either identifying factors  
19 constituting caregiver burden on informal caregivers of dementia patients<sup>7</sup>, exploring the role  
20 of self-efficacy in HRQoL of family carers of dementia patients<sup>8</sup>, reviewing evidence for  
21 negative caregiver outcomes in mild cognitive impairment (MCI)<sup>9</sup> and synthesising risk factors,  
22 or reviewing caregiver burden and interventions for familial caregivers of AD's patients<sup>11</sup>.  
23 However, apart from Shearer et al.<sup>10</sup>, none of these reviews report measurements for HRQoL  
24 of these patients or caregivers. Furthermore, Shearer et al.<sup>10</sup> did not consider dementia-  
25 specific HRQoL measures. This review therefore aims to address this gap in the literature by  
26 addressing the following questions:  
27  
28  
29  
30  
31  
32  
33  
34  
35  
36  
37  
38  
39  
40  
41

- 42 1. What is the HRQoL for people with dementia across all stages of disease severity, from  
43 its preceding state of pre-dementia (including pre-clinical AD – biomarker positive but  
44 pre-symptomatic, early symptoms, MCI, or prodromal AD), through to diagnosed  
45 dementia and end of life?  
46  
47  
48  
49  
50
- 51 2. What is the HRQoL for caregivers of people with dementia across all stages of disease  
52 severity, from its preceding stage of pre-dementia to end of life?  
53  
54  
55  
56  
57  
58  
59  
60

## Methods and analysis

### Protocol and registration

The preparation of this protocol followed the reporting guidelines of the Preferred Reporting Items for Systematic Reviews and Meta-Analysis for Protocols 2015 (PRISMA-P)<sup>17</sup>. A completed PRISMA-P checklist is available in Supplementary file 1. The protocol was registered with the PROSPERO international prospective register of systematic reviews (registration number CRD42017071416). The systematic review manuscript will be prepared following the Preferred Reporting Items for Systematic Review and Meta-Analysis (PRISMA) statement<sup>18-20</sup>. In case of amendments to this protocol, they will be reported and published with the results of the review.

### Study selection criteria

#### *Participants*

The focus of this review is on adult populations reporting to have either pre-dementia or dementia, irrespective of the type and stage of the disease, and their caregivers. Our main interest is in AD, the most common cause of dementia, but given the lack of diagnostic accuracy and the recognised overlap between different causes of dementia, all causes will be considered.

#### *Study design*

This systematic literature review will include studies reporting measurements of HRQoL for adult-onset pre-dementia or dementia patients and their caregivers published in peer-reviewed journals or grey literature. We will only include primary studies that provide quantitative results. Qualitative studies will not be included.

The following study designs will be considered for inclusion: experimental studies, quasi-

1  
2  
3 experimental studies, observational studies (either prospective or retrospective) and register-  
4 based studies. In cases where multiple studies used the same patient cohort, we will use the  
5 data from the study that presented the most detailed information on HRQoL. Case-studies,  
6 series of case-studies, studies with sample size of 30 or less patients, trial protocols, phase I  
7 clinical trials, news articles, interviews that do not use a structured quantitative questionnaire,  
8 patient education handouts, reviews, opinion or expert articles, editorials, letters to the editor,  
9 authors and editor's replies to comments will not be included.  
10  
11  
12  
13  
14  
15  
16  
17  
18

19 Modelling studies will be excluded but studies informing the model parameters will be  
20 considered for inclusion. Similarly, existing reviews of HRQoL of people with dementia and  
21 their caregivers will not be included but their reference lists will be screened for additional  
22 studies. Conference abstracts will not be included. However, the abstracts will be screened to  
23 determine whether the work presented has been published in a peer-reviewed journal or  
24 thesis. If this is the case, then the published study will be considered for inclusion.  
25  
26  
27  
28  
29  
30  
31  
32  
33

### 34 *Outcomes*

35 The outcomes of interest are:

- 36 • The HRQoL of people with either pre-dementia or dementia;
  - 37 • The HRQoL of caregivers of people with either pre-dementia or dementia.
- 38  
39  
40  
41  
42  
43  
44

45 Where possible, the HRQoL of people with dementia and their caregivers will be detailed by  
46 stage of the disease: pre-clinical dementia (biomarker positive but pre-symptomatic), early  
47 symptoms (memory and other behavioural changes), MCI, prodromal AD, mild dementia,  
48 moderate dementia, severe dementia and end of life, in order to understand how HRQoL  
49 evolves throughout disease progression.  
50  
51  
52  
53  
54  
55  
56  
57  
58  
59  
60

### *Quality of life*

A wide range of instruments have been developed to measure HRQoL. These include both generic and disease-specific instruments. Whereas generic HRQoL measures are universal and cover general health aspects, regardless of the presence or absence of a disease, disease-specific HRQoL measures target individual diseases and aim to emphasise the problems specific to patients with a specific disease, such as dementia. These generic and disease-specific instruments can be further subdivided into preference or non-preference depending on whether the index has been derived by using preference weights obtained from patients or the general public, or using simple summation of item scores.

In this review we will include any study reporting a quantitative measurement of HRQoL, regardless of the instrument used to estimate it.

### *Intervention*

All types of interventions related to dementia, either symptomatic or disease modifying, will be included. We will also include studies that have not assessed any intervention.

### *Language*

No language restrictions were applied to the search.

### *Setting*

No geography restrictions were applied to the search.

### *Search strategy*

#### *Electronic databases*



1  
2  
3 The selection of the electronic databases used was carried out with the assistance of an  
4 information specialist. The search terms were devised in conjunction with an information  
5 specialist based on the search strategy of a previous literature review<sup>10</sup>. Medical Literature  
6 Analysis and Retrieval System Online (MEDLINE), Excerpta Medica dataBASE (Embase),  
7 Cochrane Database of Systematic Reviews (CDSR), Central Register of Controlled Trials  
8 (CENTRAL), Database of Abstracts of Reviews of Effects (DARE), NHS Economic Evaluation  
9 Database (NHS EED), and PsycINFO were searched for studies published between 1<sup>st</sup> January  
10 1990 and 28<sup>th</sup> April 2017. Supplementary file 2 provides a description of the search terms used  
11 in each database.  
12  
13  
14  
15  
16  
17  
18  
19  
20  
21  
22

#### 23 *Manual searches*

24 The reference list of the studies included in this review, as well as those of previous literature  
25 reviews on HRQoL across the full spectrum of dementia, will be searched in order to identify  
26 additional potentially relevant studies. The studies informing the model parameters in  
27 identified modelling studies will be considered for inclusion. Conference abstracts identified  
28 through the electronic searches will be screened and manuscripts of relevant abstracts will be  
29 manually searched for.  
30  
31  
32  
33  
34  
35  
36  
37  
38  
39  
40

#### 41 *Study selection*

42 ENDNOTE X7, Thomson Reuters, will be used for reference management. Database results will  
43 be imported to ENDNOTE where duplicates will be removed by one reviewer (KW) based on  
44 title and first author name. Subsequently, two reviewers (FL and KW) will independently assess  
45 the titles and abstract of the studies to determine whether full text review is needed, with  
46 disagreement being resolved by a third reviewer (HW). Full text will be sought for potentially  
47 relevant studies and assessed for final inclusion by two reviewers (FL and KW) with  
48 disagreements being resolved by a third reviewer (HW). The full selection process will be  
49  
50  
51  
52  
53  
54  
55  
56  
57  
58  
59  
60

1  
2  
3 presented in a flow diagram according to PRISMA guidelines<sup>18</sup>.  
4  
5

#### 6 7 *Data extraction*

8  
9 Two of the following reviewers (SM, EN, FL, AG and JW) will extract the data from the final set  
10  
11 of studies onto a data extraction form (Supplementary file 3) with disagreements being solved  
12  
13 by a third reviewer. Two native or fluent speakers will review and extract the data for the non-  
14  
15 English references. The following information will be extracted:

- 16  
17 ● Study details: title, author, publication details, language of the study, countries of the  
18  
19 study;
- 20  
21 ● Study design: aim of the study, type of study, type of analysis, duration, outcomes  
22  
23 measured, instruments used to measure them, administration mode;
- 24  
25 ● Participant information: type of participant, setting, inclusion and exclusion criteria,  
26  
27 sample size, socio-demographic information, self or proxy-rating;
- 28  
29 ● Disease specific information: type of dementia, level of severity, instrument used to  
30  
31 measure level of severity;
- 32  
33 ● Outcomes: outcomes measured, time points measured, subgroup analysis conducted;
- 34  
35 ● Results: HRQoL of patients by disease severity, HRQoL of caregivers by disease severity  
36  
37 of the patients (where studies report HRQoL using different instruments or report the  
38  
39 same instrument in different ways, data will be extracted for each of them);
- 40  
41 ● Conclusions: Authors conclusions.  
42  
43  
44  
45

#### 46 47 *Risk of bias (quality) assessment*

48  
49 The Effective Public Health Practice Project “Quality assessment tool for quantitative studies”<sup>21</sup>  
50  
51 recommended by the Cochrane Public Health Group will be used to assess the quality of the  
52  
53 studies included in this review as it covers a wide range of study designs<sup>22</sup>. Two of above  
54  
55 mentioned reviewers will independently assess each study and two native or fluent speakers  
56  
57

1  
2  
3 will independently assess the quality of each of the non-English studies.  
4  
5

6  
7 *Description of studies and analysis*  
8

9 We expect to find a diverse range of HRQoL measures for both patients and caregivers. The  
10 HRQoL measurements will be presented separately for patients and caregivers by instrument  
11 used and, if possible, graphically. When described, distinction will be made between the  
12 different types of dementia, but with a special emphasis on AD, the most common cause. If  
13 possible, HRQoL will be reported for each stage of the disease and if the HRQoL was self-rated  
14 or proxy-rated informed by a caregiver or care/research professional. Descriptive statistics of  
15 the results will be provided.  
16  
17  
18  
19  
20  
21  
22  
23

24  
25  
26 A narrative synthesis of all relevant studies will be provided discussing differences in HRQoL  
27 measurements by instrument used to estimate it, type of dementia, disease severity, setting  
28 and describing study and participants' characteristics, results and author's conclusions.  
29  
30  
31

32  
33  
34 In case the study does not provide all the necessary data for our analysis, we will contact the  
35 authors of the studies included in this review to attempt to retrieve it.  
36  
37  
38

39  
40 If feasible, a meta-analysis of the findings will be conducted.  
41  
42  
43

44  
45 *Ethics and dissemination*  
46

47 This systematic literature review is exempt from ethical approval because the work will be  
48 carried out on published documents. The studies that are included in this review will be  
49 examined to determine if ethical issues have been considered. The results of this review will be  
50 disseminated in a peer-reviewed journal and presented at conferences, and will also  
51 contribute to the Real World Outcomes across the Alzheimer's disease spectrum for better  
52  
53  
54  
55  
56  
57

1  
2  
3 care: multi-modal data access platform (ROADMAP).  
4  
5  
6

## 7 **Discussion**

8  
9 This systematic literature review will identify and synthesize the measurements of QoL, both  
10 preference and non-preference based, for patients across the full spectrum of dementia from  
11 MCI, pre-dementia and dementia to end of life, and their caregivers. HRQoL is increasingly  
12 seen as an important outcome in dementia research and this level of detailed measurements  
13 of HRQoL will be useful and help to better inform disease progression and cost-effectiveness  
14 models of dementia.  
15  
16  
17  
18  
19  
20  
21  
22

23  
24 We will present HRQoL measurements separately by disease type, when the information is  
25 available. The main focus of our research is on AD, the most common cause of dementia, but  
26 given the lack of diagnostic accuracy and the recognised overlap between different causes of  
27 dementia, all causes of dementia will be considered.  
28  
29  
30  
31  
32  
33

34 Even though HRQoL as a measurement of the health status of individuals has been used since  
35 the second half of the 20<sup>th</sup> century, it was only in the 1990s that its use increased with the  
36 introduction of instruments such as EQ-5D-3L<sup>23</sup> and SF-6D<sup>24</sup>. As such, this review will include  
37 published studies on HRQoL since 1990. Furthermore, no languages or geographic restrictions  
38 were applied to the searches.  
39  
40  
41  
42  
43  
44  
45  
46

47 In conclusion, the results of this review could inform models assessing interventions on  
48 dementia for both patients and their caregivers by providing information about patient's and  
49 caregiver's perspective on treatment benefits. Additionally, this synthesis of HRQoL  
50 measurements for dementia patients and their caregivers can help policy makers better  
51 understand the impact of this staggering clinical condition.  
52  
53  
54  
55  
56  
57  
58  
59  
60

## Funding

This project has received funding from the Innovative Medicines Initiative 2 Joint Undertaking under grant agreement No 116020 ("ROADMAP"). This Joint Undertaking receives support from the European Union's Horizon 2020 research and innovation programme and EFPIA.

## Competing interests

FL, KW, IG, SM, EN, HW, NR, RW, JW and AMG declare that they have no competing interests. PL is employed by, owns stock in, and has stock options in Novartis Pharma AG. RH has received consulting fees from Roche, Nutricia and Piramal; research grants from private/public collaborations: IMI2-ROADMAP; Alzheimer Netherlands Flutemetamol; CTMM LEARN Grant 02 N-101; and public grants from: JPND Actifcare; and JPND BIOMARKAPD. ERD is employed by GE Healthcare. MP is an employee of Biogen and owns stock in Biogen. She owns stock in a variety of companies that at times include other pharmaceutical and health care-related companies. ATH is an employee of Eli Lilly and Company Limited and owns stock in Eli Lilly and Company Limited. Novartis Pharma AG, GE Healthcare, Biogen and Eli Lilly and Company Limited are industry partners in the ROADMAP Project.

## Contributors

FL designed the study and is the guarantor of the review. FL, KW, IG, SM, EN and HW wrote the protocol. FL, NR, RW, JW, RH, MHP, ATH and AMG devised the search strategy. PL, RW, JW, RH, ERD, MHP, ATH, and AMG critically appraised the protocol and also contributed to its development by revising different versions. All authors read and approved the final version of the manuscript.

## Acknowledgments

We would like to acknowledge the contributions of the remaining members of Work Package 5 as well as of those of the wider ROADMAP group.

## References

1. Prince M, Knapp M, Guerchet M, et al. Dementia UK: update. Alzheimer's Society 2014.
2. Association As. 2017 Alzheimer's disease facts and figures. *Alzheimer's & Dementia* 2017;**13**(4):325-73.
3. Lewis F, Karlsberg Schaffer S, Sussex J, et al. The trajectory of dementia in the UK—Making a difference. OHE Consulting 2014.
4. Banerjee S, Owen J. Living well with dementia: a national dementia strategy. London: Department of Health 2009.
5. International; WHOAsD. Dementia: a public health priority. In: Organization WH, ed., 2012.
6. Schoenmakers B, Buntinx F, Delepeleire J. Factors determining the impact of care-giving on caregivers of elderly patients with dementia. A systematic literature review. *Maturitas* 2010;**66**(2):191-200.
7. Chiao CY, Wu HS, Hsiao CY. Caregiver burden for informal caregivers of patients with dementia: A systematic review. *International nursing review* 2015;**62**(3):340-50.
8. Crellin NE, Orrell M, McDermott O, et al. Self-efficacy and health-related quality of life in family carers of people with dementia: a systematic review. *Ageing Ment Health* 2014;**18**(8):954-69.
9. Seeher K, Low LF, Reppermund S, et al. Predictors and outcomes for caregivers of people with mild cognitive impairment: a systematic literature review. *Alzheimer's & dementia : the journal of the Alzheimer's Association* 2013;**9**(3):346-55.
10. Shearer J, Green C, Ritchie CW, et al. Health state values for use in the economic evaluation of treatments for Alzheimer's disease. *Drugs & aging* 2012;**29**(1):31-43.
11. Wennberg A. DC, Streetman-Loy B., Pham H.,. Alzheimer's Patient Familial Caregivers: A Review of Burden and Interventions. *Health and Social Work* 2015;**40**(4):e162-e69.
12. Jing W, Willis R, Feng Z. Factors influencing quality of life of elderly people with dementia and care implications: A systematic review. *Archives of Gerontology and Geriatrics* 2016;**66**:23-41.
13. Beerens HC, Zwakhalen SM, Verbeek H, et al. Factors associated with quality of life of people with dementia in long-term care facilities: a systematic review. *International journal of nursing studies* 2013;**50**(9):1259-70.
14. Aspden T, Bradshaw SA, Playford ED, et al. Quality-of-life measures for use within care homes: a systematic review of their measurement properties. *Age and Ageing* 2014;**43**(5):596-603.
15. Jones C, Edwards RT, Hounsom B. Health economics research into supporting carers of people with dementia: A systematic review of outcome measures. *Health and Quality of Life Outcomes* 2012;**10**(1):142.
16. Algar K, Woods RT, Windle G. Measuring the quality of life and well-being of people with dementia: A review of observational measures. *Dementia (London, England)* 2016;**15**(4):832-57.
17. Shamseer L, Moher D, Clarke M, et al. Preferred reporting items for systematic review and meta-analysis protocols (PRISMA-P) 2015: elaboration and explanation. *Bmj* 2015;**349**:g7647.
18. Moher D, Liberati A, Tetzlaff J, et al. Preferred reporting items for systematic reviews and meta-analyses: the PRISMA statement. *PLoS med* 2009;**6**(7):e1000097.
19. Liberati A, Altman DG, Tetzlaff J, et al. The PRISMA statement for reporting systematic

- 1  
2  
3 reviews and meta-analyses of studies that evaluate health care interventions:  
4 explanation and elaboration. PLoS Med 2009;**6**(7):e1000100.
- 5 20. Welch V, Petticrew M, Tugwell P, et al. PRISMA-Equity 2012 extension: reporting guidelines  
6 for systematic reviews with a focus on health equity. Revista Panamericana de Salud  
7 Pública 2013;**34**(1):60-67.
- 8 21. Thomas H. Quality assessment tool for quantitative studies. Effective Public Health Practice  
9 Project McMaster University, Toronto 2003.
- 10 22. Armijo-Olivo S, Stiles CR, Hagen NA, et al. Assessment of study quality for systematic  
11 reviews: a comparison of the Cochrane Collaboration Risk of Bias Tool and the  
12 Effective Public Health Practice Project Quality Assessment Tool: methodological  
13 research. Journal of evaluation in clinical practice 2012;**18**(1):12-18.
- 14 23. EuroQol--a new facility for the measurement of health-related quality of life. Health policy  
15 (Amsterdam, Netherlands) 1990;**16**(3):199-208.
- 16 24. Brazier J, Usherwood T, Harper R, et al. Deriving a preference-based single index from the  
17 UK SF-36 Health Survey. Journal of clinical epidemiology 1998;**51**(11):1115-28.
- 18  
19  
20  
21  
22  
23  
24  
25  
26  
27  
28  
29  
30  
31  
32  
33  
34  
35  
36  
37  
38  
39  
40  
41  
42  
43  
44  
45  
46  
47  
48  
49  
50  
51  
52  
53  
54  
55  
56  
57  
58  
59  
60

*Supplementary file 1: PRISMA-P checklist*

| Section and topic                    | Item No. | Checklist Item                                                                                                                                                                                                                | Reported on page #   |
|--------------------------------------|----------|-------------------------------------------------------------------------------------------------------------------------------------------------------------------------------------------------------------------------------|----------------------|
| <b>A) Administrative Information</b> |          |                                                                                                                                                                                                                               |                      |
| Identification                       | 1a       | Identify the report as a protocol of a systematic review                                                                                                                                                                      | 1                    |
| Update                               | 1b       | Identify protocol as an update of a previous systematic review if applicable                                                                                                                                                  | n/a                  |
| Registration                         | 2        | Name of registry and registration number                                                                                                                                                                                      | 2                    |
| <b>B) Authors</b>                    |          |                                                                                                                                                                                                                               |                      |
| Contact                              |          | Provide name, institutional affiliation, e-mail address of all protocol authors; provide physical mailing address of corresponding author                                                                                     | 1                    |
| Contributions                        |          | Describe contributions of protocol authors and identify the guarantor of the review                                                                                                                                           | 1 + 12               |
| Amendments                           |          | If the protocol represents an amendment of a previously completed or published protocol, identify as such and list changes; otherwise, state plan for documenting important protocol amendments                               | n/a                  |
| Support                              |          |                                                                                                                                                                                                                               |                      |
| - Sources                            | 5a       | Indicate Sources of financial or other support for the review                                                                                                                                                                 | 12                   |
| - Sponsor                            | 5b       | Provide name for the review funder and/or sponsor                                                                                                                                                                             | 11                   |
| - Role of sponsor or funder          | 5c       | Describe roles of funder(s), sponsor(s) and/or institution(s), if any, in developing the protocol                                                                                                                             | 13                   |
| <b>C) Introduction</b>               |          |                                                                                                                                                                                                                               |                      |
| Rationale                            | 6        | Describe the rationale for the review in the context of what is already known                                                                                                                                                 | 3 + 4                |
| Objectives                           | 7        | Provide an explicit statement of the question(s) the review will address with reference to participants, interventions, comparators, and outcomes (PICO)                                                                      | 4 + 5                |
| <b>D) Methods</b>                    |          |                                                                                                                                                                                                                               |                      |
| Eligibility Criteria                 | 8        | Specify the study characteristics (such as PICO, study design, setting, time frame) and report characteristics (such as years considered, language, publication status) to be used as criteria for eligibility for the review | 5 + 6 + 7            |
| Information Sources                  | 9        | Describe all intended information sources (such as electronic databases, contact with study authors, trial registers or other grey literature sources) with planned dates of coverage                                         | 7 + 8                |
| Search Strategy                      | 10       | Present draft of search strategy to be used for at least one electronic database, including planned limits, such that it could be repeated                                                                                    | Supplementary file 2 |
| <b>E) Study Records</b>              |          |                                                                                                                                                                                                                               |                      |
| Data Management                      | 11a      | Describe the mechanism(s) that will be used to manage records and data throughout the review                                                                                                                                  | 8                    |



|                                    |                 |                                                                                                                                                                                                                      |                               |
|------------------------------------|-----------------|----------------------------------------------------------------------------------------------------------------------------------------------------------------------------------------------------------------------|-------------------------------|
| Selection Process                  | 11b             | State the process that will be used for selecting studies (such as two independent reviewers) through each phase of the review (that is, screening, eligibility and inclusion in meta-analysis)                      | 5 - 10                        |
| Data Collection Process            | 11c             | Describe planned method of extracting data from reports (such as piloting forms, done independently, in duplicate), any processes for obtaining and confirming data from investigators                               | 8 - 10 + Supplementary file 3 |
| Data Items                         | 12              | List and define all variables for which data will be sought (such as PICO items, funding sources), any pre-planned data assumptions and simplifications                                                              | 8 - 9                         |
| Outcomes and prioritization        | 13              | List and define all outcomes for which data will be sought, including prioritization of main and additional outcomes, with rationale                                                                                 | 6 + 9                         |
| <b>Section and topic</b>           | <b>Item No.</b> | <b>Checklist Item</b>                                                                                                                                                                                                | <b>Reported on page #</b>     |
| Risk of bias in individual studies | 14              | Describe anticipated methods for assessing risk of bias of individual studies, including whether this will be done at the outcome or study level, or both; state how this information will be used in data synthesis | 9                             |
| Data Synthesis                     | 15a             | Describe criteria under which study data will be quantitatively synthesised                                                                                                                                          | 9 + 10                        |
|                                    | 15b             | If data are appropriate for quantitative synthesis, describe planned summary measures, methods of handling data and methods of combining data from studies, including any planned exploration of consistency         | 10                            |
|                                    | 15c             | Describe any proposed additional analyses (such as sensitivity or subgroup analyses, meta-regression)                                                                                                                | 10                            |
|                                    | 15d             | If quantitative synthesis is not appropriate, describe the type of summary planned                                                                                                                                   | 9 – 10                        |
| Meta-bias(es)                      | 16              | Specify any planned assessment of meta-bias(es) (such as publication bias across studies, selective reporting within studies)                                                                                        | n.a.                          |
| Confidence in cumulative evidence  | 17              | Describe how the strength of the body of evidence will be assessed                                                                                                                                                   | 9 – 10                        |

## Supplementary file 2: Search terms

## Medline

| #  | Searches                                                                                                                                                                                                                                                                                                                                                                                                                                                                                                                | Results |
|----|-------------------------------------------------------------------------------------------------------------------------------------------------------------------------------------------------------------------------------------------------------------------------------------------------------------------------------------------------------------------------------------------------------------------------------------------------------------------------------------------------------------------------|---------|
| 1  | *dementia/ or *alzheimer disease/ or exp *dementia, vascular/ or exp *frontotemporal lobar degeneration/                                                                                                                                                                                                                                                                                                                                                                                                                | 98,731  |
| 2  | *Cognitive Dysfunction/                                                                                                                                                                                                                                                                                                                                                                                                                                                                                                 | 4,368   |
| 3  | (dementia* or alzheimer*).ti.                                                                                                                                                                                                                                                                                                                                                                                                                                                                                           | 92,750  |
| 4  | ((mild* or early* or preclinical or pre-clinical) adj2 (cognitive impair* or cognitive dysfunction or cognitive decline)).ti.                                                                                                                                                                                                                                                                                                                                                                                           | 5,582   |
| 5  | 1 or 2 or 3 or 4                                                                                                                                                                                                                                                                                                                                                                                                                                                                                                        | 118,970 |
| 6  | *"Quality of Life"/                                                                                                                                                                                                                                                                                                                                                                                                                                                                                                     | 69,834  |
| 7  | ("quality of life" or "quality of wellbeing" or "quality of well-being").ti.                                                                                                                                                                                                                                                                                                                                                                                                                                            | 55,455  |
| 8  | (qol or hqol or hrqol or hrql or hr-qol or hr-ql or euroqol or euro qol or eq5d or eq-5d or eq-vas or vas or whoqol or who qol or reqol*).ti,ab.                                                                                                                                                                                                                                                                                                                                                                        | 81,919  |
| 9  | (sf6 or sf6d or sf12 or sf16 or sf20 or sf36).ti,ab.                                                                                                                                                                                                                                                                                                                                                                                                                                                                    | 2,656   |
| 10 | ((sf or shortform or short-form) adj ("6" or 6d or "12" or "16" or "20" or "36" or six or twelve or sixteen or twenty or thirtysix or thirty six)).ti,ab.                                                                                                                                                                                                                                                                                                                                                               | 26,238  |
| 11 | (icepop or icecap* or duke health profile or dhp or core outcome measure? or core om).ti,ab.                                                                                                                                                                                                                                                                                                                                                                                                                            | 2,772   |
| 12 | (aaiqol or aai-qol or cdqlp or qolas or qolad or qol-ad or qold or dqol or demqol or adrql or adrql or oqold or oqolda or seiql or rsoc-qol or qualid or qualidem or qw-b-sa or hsq-12 or zbi or zarit or ces-d or "activity and affect indicator*" or dcm or pwbcip or pwb-cip or npi-d or ham-d or basquid or basqid or stai or stai-5 or bdi or gds or gps or hui or hui-ii or hui-iii or isd or pds or pes-ad or pesad or pes-ad-aes or pesadaes or ghq or cas or cbs or qw-b or cbi or bsi or srb or phq-9).ti,ab. | 82,505  |
| 13 | (modified coop* or modified wonca* or "psychological well-being in cognitively impaired persons").ti,ab.                                                                                                                                                                                                                                                                                                                                                                                                                | 23      |
| 14 | *Personal Satisfaction/ or *Patient Satisfaction/                                                                                                                                                                                                                                                                                                                                                                                                                                                                       | 31,894  |
| 15 | ((life or patient* or carer? or caregiver? or spous* or wife or wives or husband?) adj satisfaction).ti.                                                                                                                                                                                                                                                                                                                                                                                                                | 7,129   |
| 16 | ((life or patient* or carer? or caregiver? or spous* or wife or wives or husband?) adj (experience? or preference? or perspective?)).ti.                                                                                                                                                                                                                                                                                                                                                                                | 8,647   |
| 17 | (wellbeing or well-being).ti.                                                                                                                                                                                                                                                                                                                                                                                                                                                                                           | 11,493  |
| 18 | ((life or patient* or carer? or caregiver? or spous* or wife or wives or husband?) adj (experience? or preference? or perspective?)).ti.                                                                                                                                                                                                                                                                                                                                                                                | 8,647   |
| 19 | caregiver time.ti,ab.                                                                                                                                                                                                                                                                                                                                                                                                                                                                                                   | 140     |
| 20 | 14 or 15 or 16 or 17 or 18 or 19                                                                                                                                                                                                                                                                                                                                                                                                                                                                                        | 51,145  |
| 21 | "surveys and questionnaires"/ or self report/                                                                                                                                                                                                                                                                                                                                                                                                                                                                           | 394,101 |
| 22 | (questionnaire? or survey?).ti,ab.                                                                                                                                                                                                                                                                                                                                                                                                                                                                                      | 804,666 |
| 23 | self report.ti,ab.                                                                                                                                                                                                                                                                                                                                                                                                                                                                                                      | 42,432  |
| 24 | ((patient* or carer? or caregiver? or spous* or wife or wives or husband? or proxy) adj report?).ti,ab.                                                                                                                                                                                                                                                                                                                                                                                                                 | 7,095   |
| 25 | 21 or 22 or 23 or 24                                                                                                                                                                                                                                                                                                                                                                                                                                                                                                    | 976,414 |

|    |                                                                                                                                                                                 |           |
|----|---------------------------------------------------------------------------------------------------------------------------------------------------------------------------------|-----------|
| 26 | 20 and 25                                                                                                                                                                       | 23,719    |
| 27 | *Caregivers/ and *"Cost of Illness"/                                                                                                                                            | 1,619     |
| 28 | ((carer? or caregiver? or care or spous* or wife or wives or husband?) adj2 (burden* or cost?)).ti.                                                                             | 5,142     |
| 29 | burden interview?.ti.                                                                                                                                                           | 50        |
| 30 | "value of life".ti.                                                                                                                                                             | 87        |
| 31 | *"Activities of Daily Living"/                                                                                                                                                  | 17,986    |
| 32 | ("activities of daily living" or acdl or funtional status).ti.                                                                                                                  | 1,772     |
| 33 | *quality-adjusted life years/                                                                                                                                                   | 1,917     |
| 34 | ("quality adjusted life years" or "disability adjusted life years" or qaly? or daly? or qald or qale or qtime or qaly).ti.                                                      | 764       |
| 35 | *Health Status/                                                                                                                                                                 | 34,353    |
| 36 | *sickness impact profile/                                                                                                                                                       | 2,623     |
| 37 | (standard gamble or "time trade off" or utility index or visual analog*).ti,ab.                                                                                                 | 48,455    |
| 38 | (health utilit* or disutilit* or utility value?).ti,ab.                                                                                                                         | 2,889     |
| 39 | health status.ti.                                                                                                                                                               | 9,145     |
| 40 | 6 or 7 or 8 or 9 or 10 or 11 or 12 or 13 or 26 or 27 or 28 or 29 or 30 or 31 or 32 or 33 or 34 or 35 or 36 or 37 or 38 or 39                                                    | 322,206   |
| 41 | 5 and 40                                                                                                                                                                        | 4,530     |
| 42 | limit 41 to yr="1990 -Current"                                                                                                                                                  | 4,445     |
| 43 | (case reports or clinical trial phase i or comment or editorial or letter).pt. or Clinical Trials, Phase I as Topic/ or (case report or case study or letter? or editorial).ti. | 3,400,815 |
| 44 | grounded theory/ or exp qualitative research/ or (qualitative research or qualitative study or qualitative interview* or grounded theory or hermeneutic*).ti,ab.                | 67,630    |
| 45 | 43 or 44                                                                                                                                                                        | 3,466,599 |
| 46 | 42 not 45                                                                                                                                                                       | 4,087     |

### Embase

| # | Searches                                                                                                                                         | Results |
|---|--------------------------------------------------------------------------------------------------------------------------------------------------|---------|
| 1 | exp *dementia/ or *alzheimer's disease/                                                                                                          | 177,994 |
| 2 | *cognitive impairment/                                                                                                                           | 40,861  |
| 3 | (dementia* or alzheimer*).ti.                                                                                                                    | 119,362 |
| 4 | ((mild* or early* or preclinical or pre-clinical) adj2 (cognitive impair* or cognitive dysfunction or cognitive decline)).ti.                    | 8,090   |
| 5 | 1 or 2 or 3 or 4                                                                                                                                 | 223,452 |
| 6 | exp *"quality of life"/                                                                                                                          | 80,143  |
| 7 | ("quality of life" or "quality of wellbeing" or "quality of well-being").ti.                                                                     | 76,232  |
| 8 | (qol or hqol or hrqol or hrql or hr-qol or hr-ql or euroqol or euro qol or eq5d or eq-5d or eq-vas or vas or whoqol or who qol or reqol*).ti,ab. | 129,834 |
| 9 | (sf6 or sf6d or sf12 or sf16 or sf20 or sf36).ti,ab.                                                                                             | 4,872   |

|    |                                                                                                                                                                                                                                                                                                                                                                                                                                                                                                                      |           |
|----|----------------------------------------------------------------------------------------------------------------------------------------------------------------------------------------------------------------------------------------------------------------------------------------------------------------------------------------------------------------------------------------------------------------------------------------------------------------------------------------------------------------------|-----------|
| 10 | ((sf or shortform or short-form) adj ("6" or 6d or "12" or "16" or "20" or "36" or six or twelve or sixteen or twenty or thirtysix or thirty six)).ti,ab.                                                                                                                                                                                                                                                                                                                                                            | 37,206    |
| 11 | (icepop or icecap* or duke health profile or dhp or core outcome measure? or core om).ti,ab.                                                                                                                                                                                                                                                                                                                                                                                                                         | 3,316     |
| 12 | (aaiqol or aai-qol or cdqlp or qolas or qolad or qol-ad or qold or dqol or demqol or adrql or adrql or oqold or oqolda or seiql or rsoc-qol or qualid or qualidem or qwb-sa or hsq-12 or zbi or zarit or ces-d or "activity and affect indicator*" or dcm or pwbcip or pwb-cip or npi-d or ham-d or basqid or basqid or stai or stai-5 or bdi or gds or gps or hui or hui-ii or hui-iii or isd or pds or pes-ad or pesad or pes-ad-aes or pesadaes or ghq or cas or cbs or qwb or cbi or bsi or srb or phq-9).ti,ab. | 114,337   |
| 13 | (modified coop* or modified wonca* or "psychological well-being in cognitively impaired persons").ti,ab.                                                                                                                                                                                                                                                                                                                                                                                                             | 29        |
| 14 | *client satisfaction/ or *life satisfaction/                                                                                                                                                                                                                                                                                                                                                                                                                                                                         | 1,991     |
| 15 | ((life or patient* or carer? or caregiver? or spous* or wife or wives or husband?) adj satisfaction).ti.                                                                                                                                                                                                                                                                                                                                                                                                             | 8,839     |
| 16 | ((life or patient* or carer? or caregiver? or spous* or wife or wives or husband?) adj (experience? or preference? or perspective?)).ti.                                                                                                                                                                                                                                                                                                                                                                             | 11,228    |
| 17 | (wellbeing or well-being).ti.                                                                                                                                                                                                                                                                                                                                                                                                                                                                                        | 12,234    |
| 18 | ((life or patient* or carer? or caregiver? or spous* or wife or wives or husband?) adj (experience? or preference? or perspective?)).ti.                                                                                                                                                                                                                                                                                                                                                                             | 11,228    |
| 19 | caregiver time.ti,ab.                                                                                                                                                                                                                                                                                                                                                                                                                                                                                                | 183       |
| 20 | 14 or 15 or 16 or 17 or 18 or 19                                                                                                                                                                                                                                                                                                                                                                                                                                                                                     | 33,365    |
| 21 | "surveys and questionnaires"/ or self report/                                                                                                                                                                                                                                                                                                                                                                                                                                                                        | 582,726   |
| 22 | (questionnaire? or survey?).ti,ab.                                                                                                                                                                                                                                                                                                                                                                                                                                                                                   | 1,011,521 |
| 23 | self report.ti,ab.                                                                                                                                                                                                                                                                                                                                                                                                                                                                                                   | 50,950    |
| 24 | ((patient* or carer? or caregiver? or spous* or wife or wives or husband? or proxy) adj report?).ti,ab.                                                                                                                                                                                                                                                                                                                                                                                                              | 10,383    |
| 25 | 21 or 22 or 23 or 24                                                                                                                                                                                                                                                                                                                                                                                                                                                                                                 | 1,187,376 |
| 26 | 20 and 25                                                                                                                                                                                                                                                                                                                                                                                                                                                                                                            | 14,705    |
| 27 | *caregiver burden/                                                                                                                                                                                                                                                                                                                                                                                                                                                                                                   | 1,934     |
| 28 | ((carer? or caregiver? or care or spous* or wife or wives or husband?) adj2 (burden* or cost?)).ti.                                                                                                                                                                                                                                                                                                                                                                                                                  | 6,435     |
| 29 | burden interview?.ti.                                                                                                                                                                                                                                                                                                                                                                                                                                                                                                | 59        |
| 30 | "value of life".ti.                                                                                                                                                                                                                                                                                                                                                                                                                                                                                                  | 96        |
| 31 | *"activities of daily living"/                                                                                                                                                                                                                                                                                                                                                                                                                                                                                       | 8,385     |
| 32 | ("activities of daily living" or acdl or funtional status).ti.                                                                                                                                                                                                                                                                                                                                                                                                                                                       | 2,164     |
| 33 | *quality adjusted life year/                                                                                                                                                                                                                                                                                                                                                                                                                                                                                         | 1,084     |
| 34 | ("quality adjusted life years" or "disability adjusted life years" or qaly? or daly? or qald or qale or qtime or qaly).ti.                                                                                                                                                                                                                                                                                                                                                                                           | 898       |
| 35 | *Health Status/                                                                                                                                                                                                                                                                                                                                                                                                                                                                                                      | 28,930    |
| 36 | *sickness impact profile/                                                                                                                                                                                                                                                                                                                                                                                                                                                                                            | 689       |
| 37 | (standard gamble or "time trade off" or utility index or visual analog*).ti,ab.                                                                                                                                                                                                                                                                                                                                                                                                                                      | 64,774    |
| 38 | (health utilit* or disutilit* or utility value?).ti,ab.                                                                                                                                                                                                                                                                                                                                                                                                                                                              | 4,516     |
| 39 | health status.ti.                                                                                                                                                                                                                                                                                                                                                                                                                                                                                                    | 9,969     |
| 40 | 6 or 7 or 8 or 9 or 10 or 11 or 12 or 13 or 26 or 27 or 28 or 29 or 30 or 31 or 32 or 33 or 34 or 35 or 36 or 37 or 38 or 39                                                                                                                                                                                                                                                                                                                                                                                         | 393,955   |

|    |                                                                                                                                                                  |           |
|----|------------------------------------------------------------------------------------------------------------------------------------------------------------------|-----------|
| 41 | 5 and 40                                                                                                                                                         | 6,763     |
| 42 | limit 41 to yr="1990 -Current"                                                                                                                                   | 6,613     |
| 43 | (editorial or letter or note or press).pt. or "phase 1 clinical trial (topic)"/ or case report/ or (case report or case study or letter? or editorial).ti.       | 4,421,368 |
| 44 | grounded theory/ or exp qualitative research/ or (qualitative research or qualitative study or qualitative interview* or grounded theory or hermeneutic*).ti,ab. | 71,138    |
| 45 | 43 or 44                                                                                                                                                         | 4,489,168 |
| 46 | 42 not 45                                                                                                                                                        | 6,122     |

### PsycINFO

| #  | Searches                                                                                                                                                                                                                                                                                                                                                                                                                                                                                                              | Results |
|----|-----------------------------------------------------------------------------------------------------------------------------------------------------------------------------------------------------------------------------------------------------------------------------------------------------------------------------------------------------------------------------------------------------------------------------------------------------------------------------------------------------------------------|---------|
| 1  | exp *dementia/ or *alzheimer's disease/                                                                                                                                                                                                                                                                                                                                                                                                                                                                               | 58,737  |
| 2  | *cognitive impairment/                                                                                                                                                                                                                                                                                                                                                                                                                                                                                                | 23,977  |
| 3  | (dementia* or alzheimer*).ti.                                                                                                                                                                                                                                                                                                                                                                                                                                                                                         | 47,312  |
| 4  | ((mild* or early* or preclinical or pre-clinical) adj2 (cognitive impair* or cognitive dysfunction or cognitive decline)).ti.                                                                                                                                                                                                                                                                                                                                                                                         | 3,675   |
| 5  | 1 or 2 or 3 or 4                                                                                                                                                                                                                                                                                                                                                                                                                                                                                                      | 77,854  |
| 6  | exp *"quality of life"/                                                                                                                                                                                                                                                                                                                                                                                                                                                                                               | 28,944  |
| 7  | ("quality of life" or "quality of wellbeing" or "quality of well-being").ti.                                                                                                                                                                                                                                                                                                                                                                                                                                          | 17,544  |
| 8  | (qol or hqol or hrqol or hrql or hr-qol or hr-ql or euroqol or euro qol or eq5d or eq-5d or eq-vas or vas or whoqol or who qol or reqol*).ti,ab.                                                                                                                                                                                                                                                                                                                                                                      | 15,758  |
| 9  | (sf6 or sf6d or sf12 or sf16 or sf20 or sf36).ti,ab.                                                                                                                                                                                                                                                                                                                                                                                                                                                                  | 243     |
| 10 | ((sf or shortform or short-form) adj ("6" or 6d or "12" or "16" or "20" or "36" or six or twelve or sixteen or twenty or thirtysix or thirty six)).ti,ab.                                                                                                                                                                                                                                                                                                                                                             | 5,546   |
| 11 | (icepop or icecap* or duke health profile or dhp or core outcome measure? or core om).ti,ab.                                                                                                                                                                                                                                                                                                                                                                                                                          | 367     |
| 12 | (aaiqol or aai-qol or cdqlp or qolas or qolad or qol-ad or qold or dqol or demqol or adrql or adrql or oqold or oqolda or seiql or rsoc-qol or qualid or qualidem or qwb-sa or hsq-12 or zbi or zarit or ces-d or "activity and affect indicator*" or dcm or pwbcip or pwb-cip or npi-d or ham-d or basquid or basqid or stai or stai-5 or bdi or gds or gps or hui or hui-ii or hui-iii or isd or pds or pes-ad or pesad or pes-ad-aes or pesadaes or ghq or cas or cbs or qwb or cbi or bsi or srb or phq-9).ti,ab. | 27,360  |
| 13 | (modified coop* or modified wonca* or "psychological well-being in cognitively impaired persons").ti,ab.                                                                                                                                                                                                                                                                                                                                                                                                              | 14      |
| 14 | *client satisfaction/ or *life satisfaction/                                                                                                                                                                                                                                                                                                                                                                                                                                                                          | 10,500  |
| 15 | ((life or patient* or carer? or caregiver? or spous* or wife or wives or husband?) adj satisfaction).ti.                                                                                                                                                                                                                                                                                                                                                                                                              | 4,378   |
| 16 | ((life or patient* or carer? or caregiver? or spous* or wife or wives or husband?) adj (experience? or preference? or perspective?)).ti.                                                                                                                                                                                                                                                                                                                                                                              | 3,089   |
| 17 | (wellbeing or well-being).ti.                                                                                                                                                                                                                                                                                                                                                                                                                                                                                         | 17,565  |
| 18 | ((life or patient* or carer? or caregiver? or spous* or wife or wives or husband?) adj (experience? or preference? or perspective?)).ti.                                                                                                                                                                                                                                                                                                                                                                              | 3,089   |
| 19 | caregiver time.ti,ab.                                                                                                                                                                                                                                                                                                                                                                                                                                                                                                 | 51      |

|    |                                                                                                                                                              |         |
|----|--------------------------------------------------------------------------------------------------------------------------------------------------------------|---------|
| 20 | 14 or 15 or 16 or 17 or 18 or 19                                                                                                                             | 30,716  |
| 21 | questionnaires/ or surveys/ or self report/                                                                                                                  | 36,535  |
| 22 | (questionnaire? or survey?).ti,ab.                                                                                                                           | 409,092 |
| 23 | self report.ti,ab.                                                                                                                                           | 49,405  |
| 24 | ((patient* or carer? or caregiver? or spous* or wife or wives or husband? or proxy) adj report?).ti,ab.                                                      | 2,724   |
| 25 | 21 or 22 or 23 or 24                                                                                                                                         | 446,678 |
| 26 | 20 and 25                                                                                                                                                    | 10,093  |
| 27 | *caregiver burden/                                                                                                                                           | 4,122   |
| 28 | ((carer? or caregiver? or care or spous* or wife or wives or husband?) adj2 (burden* or cost?)).ti.                                                          | 1,257   |
| 29 | burden interview?.ti.                                                                                                                                        | 42      |
| 30 | "value of life".ti.                                                                                                                                          | 33      |
| 31 | *"activities of daily living"/                                                                                                                               | 3,835   |
| 32 | ("activities of daily living" or acdl or funtional status).ti.                                                                                               | 734     |
| 33 | ("quality adjusted life years" or "disability adjusted life years" or qaly? or daly? or qald or qale or qtime or qaly).ti.                                   | 142     |
| 34 | (standard gamble or "time trade off" or utility index or visual analog*).ti,ab.                                                                              | 6,195   |
| 35 | (health utilit* or disutilit* or utility value?).ti,ab.                                                                                                      | 877     |
| 36 | health status.ti.                                                                                                                                            | 2,312   |
| 37 | 6 or 7 or 8 or 9 or 10 or 11 or 12 or 13 or 26 or 27 or 28 or 29 or 30 or 31 or 32 or 33 or 34 or 35 or 36                                                   | 85,145  |
| 38 | 5 and 37                                                                                                                                                     | 4,392   |
| 39 | limit 38 to yr="1990 -Current"                                                                                                                               | 4,344   |
| 40 | case report/ or (case report or case study or letter? or editorial).ti.                                                                                      | 62,005  |
| 41 | grounded theory/ or qualitative research/ or (qualitative research or qualitative study or qualitative interview* or grounded theory or hermeneutic*).ti,ab. | 61,499  |
| 42 | 40 or 41                                                                                                                                                     | 122,316 |
| 43 | 39 not 42                                                                                                                                                    | 4,208   |

*Cochrane Database of Systematic Reviews, Cochrane Central Register of Controlled Trials, Database Abstract of Reviews of Effects, NHS Economic Evaluation Database*

| ID | Search                                                                                                                                                                                |
|----|---------------------------------------------------------------------------------------------------------------------------------------------------------------------------------------|
| #1 | MeSH descriptor: [Dementia] explode all trees                                                                                                                                         |
| #2 | MeSH descriptor: [Mild Cognitive Impairment] explode all trees                                                                                                                        |
| #3 | dementia* or alzheimer*:ti (Word variations have been searched)                                                                                                                       |
| #4 | ((mild* or early* or preclinical or pre-clinical) near/2 (cognitive impair* or cognitive dysfunction or cognitive decline)):ti (Word variations have been searched)                   |
| #5 | #1 or #2 or #3 or #4                                                                                                                                                                  |
| #6 | MeSH descriptor: [Quality of Life] explode all trees                                                                                                                                  |
| #7 | quality of life or "quality of wellbeing" or "quality of well-being":ti (Word variations have been searched)                                                                          |
| #8 | qol or hqol or hrqol or hrql or hr-qol or hr-ql or euroqol or euro qol or eq5d or eq-5d or eq-vas or vas or whoqol or who qol or reqol*:ti,ab,kw (Word variations have been searched) |

|     |                                                                                                                                                                                                                                                                                                                                                                                                                                                                                                                                                             |
|-----|-------------------------------------------------------------------------------------------------------------------------------------------------------------------------------------------------------------------------------------------------------------------------------------------------------------------------------------------------------------------------------------------------------------------------------------------------------------------------------------------------------------------------------------------------------------|
| #9  | sf6 or sf6d or sf12 or sf16 or sf20 or sf36:ti,ab,kw (Word variations have been searched)                                                                                                                                                                                                                                                                                                                                                                                                                                                                   |
| #10 | ((sf or shortform or short-form) next ("6" or 6d or "12" or "16" or "20" or "36" or six or twelve or sixteen or twenty or thirtysix or thirty six)):ti,ab,kw (Word variations have been searched)                                                                                                                                                                                                                                                                                                                                                           |
| #11 | icepop or icecap* or "duke health profile" or dhp or "core outcome measure?" or "core om":ti,ab,kw (Word variations have been searched)                                                                                                                                                                                                                                                                                                                                                                                                                     |
| #12 | aaiqol or aai-qol or cdqlp or qolas or qolad or qol-ad or qold or dqol or demqol or adrql or adrql or oqold or oqolda or seiqol or rsoc-qol or qualid or qualidem or qwb-sa or hsq-12 or zbi or zarit or ces-d or "activity and affect indicator*" or dcm or pwbcip or pwb-cip or npi-d or ham-d or basquid or basqid or stai or stai-5 or bdi or gds or gps or hui or hui-ii or hui-iii or isd or pds or pes-ad or pesad or pes-ad-aes or pesadaes or ghq or cas or cbs or qwb or cbi or bsi or srb or phq-9:ti,ab,kw (Word variations have been searched) |
| #13 | modified coop* or "modified wonca*" or "psychological well-being in cognitively impaired persons":ti,ab,kw (Word variations have been searched)                                                                                                                                                                                                                                                                                                                                                                                                             |
| #14 | MeSH descriptor: [Patient Satisfaction] this term only                                                                                                                                                                                                                                                                                                                                                                                                                                                                                                      |
| #15 | MeSH descriptor: [Personal Satisfaction] explode all trees                                                                                                                                                                                                                                                                                                                                                                                                                                                                                                  |
| #16 | ((life or patient* or carer? or caregiver? or spous* or wife or wives or husband?) next satisfaction):ti,ab,kw (Word variations have been searched)                                                                                                                                                                                                                                                                                                                                                                                                         |
| #17 | ((life or patient* or carer? or caregiver? or spous* or wife or wives or husband?) next (experience? or preference? or perspective?):ti,ab,kw (Word variations have been searched)                                                                                                                                                                                                                                                                                                                                                                          |
| #18 | wellbeing or well-being:ti (Word variations have been searched)                                                                                                                                                                                                                                                                                                                                                                                                                                                                                             |
| #19 | ((life or patient* or carer? or caregiver? or spous* or wife or wives or husband?) next (experience? or preference? or perspective?):ti,ab,kw (Word variations have been searched)                                                                                                                                                                                                                                                                                                                                                                          |
| #20 | caregiver time:ti,ab,kw (Word variations have been searched)                                                                                                                                                                                                                                                                                                                                                                                                                                                                                                |
| #21 | ((carer? or caregiver? or care or spous* or wife or wives or husband?) near/2 (burden* or cost?):ti,ab,kw (Word variations have been searched)                                                                                                                                                                                                                                                                                                                                                                                                              |
| #22 | burden interview?:ti,ab,kw (Word variations have been searched)                                                                                                                                                                                                                                                                                                                                                                                                                                                                                             |
| #23 | value of life:ti,ab,kw (Word variations have been searched)                                                                                                                                                                                                                                                                                                                                                                                                                                                                                                 |
| #24 | MeSH descriptor: [Activities of Daily Living] explode all trees                                                                                                                                                                                                                                                                                                                                                                                                                                                                                             |
| #25 | activities of daily living or acdl or "functional status":ti,ab,kw (Word variations have been searched)                                                                                                                                                                                                                                                                                                                                                                                                                                                     |
| #26 | MeSH descriptor: [Quality-Adjusted Life Years] explode all trees                                                                                                                                                                                                                                                                                                                                                                                                                                                                                            |
| #27 | quality adjusted life years or "disability adjusted life years" or qaly? or daly? or qald or qale or qtime or qaly:ti,ab,kw (Word variations have been searched)                                                                                                                                                                                                                                                                                                                                                                                            |
| #28 | MeSH descriptor: [Health Status] this term only                                                                                                                                                                                                                                                                                                                                                                                                                                                                                                             |
| #29 | MeSH descriptor: [Sickness Impact Profile] explode all trees                                                                                                                                                                                                                                                                                                                                                                                                                                                                                                |
| #30 | standard gamble or "time trade off" or "utility index" or "visual analog*":ti,ab,kw (Word variations have been searched)                                                                                                                                                                                                                                                                                                                                                                                                                                    |
| #31 | health utilit* or disutilit* or "utility value?":ti,ab,kw (Word variations have been searched)                                                                                                                                                                                                                                                                                                                                                                                                                                                              |
| #32 | HEALTH STATUS:ti (Word variations have been searched)                                                                                                                                                                                                                                                                                                                                                                                                                                                                                                       |
| #33 | #6 or #7 or #8 or #9 or #10 or #11 or #12 or #13 or #14 or #15 or #16 or #17 or #18 or #19 or #20 or #21 or #22 or #23 or #24 or #25 or #26 or #27 or #28 or #29 or #30 or #31 or #32                                                                                                                                                                                                                                                                                                                                                                       |
| #34 | #5 and #33                                                                                                                                                                                                                                                                                                                                                                                                                                                                                                                                                  |



## Supplementary file 3: Data extraction form

## QoL Data Extraction Form

|                                                                                                               |  |
|---------------------------------------------------------------------------------------------------------------|--|
| Study ID ( <i>surname of first author and year first full report of study was published e.g. Smith 2001</i> ) |  |
| Publication Title                                                                                             |  |
| Notes:                                                                                                        |  |

**General Information**

|                                                       |  |
|-------------------------------------------------------|--|
| Date when form was completed ( <i>dd/mm/yyyy</i> )    |  |
| Name of person extracting data                        |  |
| Language of study                                     |  |
| Corresponding author contact details                  |  |
| Publication type (e.g. full report, abstract, letter) |  |
| Notes:                                                |  |

**Study Design**

|                   | Descriptions as stated in the study                                                                                                                                                                                                                                                                                                                                                                                                                                                                                                                                                                                                                           |
|-------------------|---------------------------------------------------------------------------------------------------------------------------------------------------------------------------------------------------------------------------------------------------------------------------------------------------------------------------------------------------------------------------------------------------------------------------------------------------------------------------------------------------------------------------------------------------------------------------------------------------------------------------------------------------------------|
| Aim of the study  |                                                                                                                                                                                                                                                                                                                                                                                                                                                                                                                                                                                                                                                               |
| Type of study     | Interventional study: <ul style="list-style-type: none"> <li>Randomised controlled trial <input type="checkbox"/></li> <li>Non-randomised controlled trial <input type="checkbox"/></li> <li>Cross-over randomised controlled trial <input type="checkbox"/></li> <li>Before-and-after study <input type="checkbox"/></li> </ul> Observational study: <ul style="list-style-type: none"> <li>Case-control study <input type="checkbox"/></li> <li>Cohort study <input type="checkbox"/></li> <li>Cross-sectional study <input type="checkbox"/></li> <li>Other (specify):</li> </ul> Register based study <input type="checkbox"/><br>Other design (specify): |
| Type of analysis  | Prospective <input type="checkbox"/><br>Retrospective <input type="checkbox"/><br>Unclear <input type="checkbox"/>                                                                                                                                                                                                                                                                                                                                                                                                                                                                                                                                            |
| QoL instrument(s) |                                                                                                                                                                                                                                                                                                                                                                                                                                                                                                                                                                                                                                                               |



|                                                                                                        |                                                                                           |
|--------------------------------------------------------------------------------------------------------|-------------------------------------------------------------------------------------------|
| QoL instrument language                                                                                |                                                                                           |
| QoL instrument mode of administration (e.g. paper copy; electronic; telephone; face-to-face interview) |                                                                                           |
| Outcomes measured other than QoL?                                                                      |                                                                                           |
| Start date                                                                                             |                                                                                           |
| End date                                                                                               |                                                                                           |
| Follow up (in months)                                                                                  |                                                                                           |
| Ethical approval needed/ obtained for study                                                            | <input type="checkbox"/> Yes <input type="checkbox"/> No <input type="checkbox"/> Unclear |

**Participants**

|                                               | Description as stated in paper/report                                                                                                                                                                                                                                                                                     |
|-----------------------------------------------|---------------------------------------------------------------------------------------------------------------------------------------------------------------------------------------------------------------------------------------------------------------------------------------------------------------------------|
| Country (ies)                                 |                                                                                                                                                                                                                                                                                                                           |
| Population Description                        |                                                                                                                                                                                                                                                                                                                           |
| Type of Participant                           | Patients <input type="checkbox"/><br>Caregivers <input type="checkbox"/><br>Other: ..... <input type="checkbox"/>                                                                                                                                                                                                         |
| Setting                                       | Community <input type="checkbox"/><br>Institutional <input type="checkbox"/><br>Primary Care <input type="checkbox"/><br>Secondary Care <input type="checkbox"/><br>Tertiary Care <input type="checkbox"/><br>Mixed <input type="checkbox"/><br>Unclear <input type="checkbox"/><br>Other: ..... <input type="checkbox"/> |
| <b>Enrolment Eligibility</b>                  |                                                                                                                                                                                                                                                                                                                           |
| A. Inclusion Criteria                         | A.                                                                                                                                                                                                                                                                                                                        |
| B. Exclusion Criteria                         | B.                                                                                                                                                                                                                                                                                                                        |
| Recruitment Process                           |                                                                                                                                                                                                                                                                                                                           |
| Sample Size                                   |                                                                                                                                                                                                                                                                                                                           |
| Mean age of patients                          |                                                                                                                                                                                                                                                                                                                           |
| Patients gender (% of females in the sample)  |                                                                                                                                                                                                                                                                                                                           |
| Mean age of caregiver                         |                                                                                                                                                                                                                                                                                                                           |
| Caregiver gender (% of females in the sample) |                                                                                                                                                                                                                                                                                                                           |
| Caregiver relationship to patient             | Spouse _____%      Daughter/son-in-law _____%<br>Daughter _____%      Grandchild _____%                                                                                                                                                                                                                                   |

|                                                 |                |                         |
|-------------------------------------------------|----------------|-------------------------|
|                                                 | Son _____%     | Friend _____%           |
|                                                 | Brother _____% | Other: _____ and _____% |
|                                                 | Sister _____%  |                         |
| Any other relevant sociodemographic information |                |                         |
| Notes:                                          |                |                         |

**Dementia Diagnosis**

|                                | Description as stated in paper/report                                                                                                                                                                                                                                                                                                          |
|--------------------------------|------------------------------------------------------------------------------------------------------------------------------------------------------------------------------------------------------------------------------------------------------------------------------------------------------------------------------------------------|
| Type of Dementia               | Alzheimer’s Disease <input type="checkbox"/><br>Lewy Body Dementia <input type="checkbox"/><br>Vascular Dementia <input type="checkbox"/><br>Mixed <input type="checkbox"/><br>Other: ..... <input type="checkbox"/>                                                                                                                           |
| Disease Severity               | Pre-clinical dementia <input type="checkbox"/><br>Early symptoms <input type="checkbox"/><br>MCI <input type="checkbox"/><br>Prodromal AD <input type="checkbox"/><br>Mild dementia <input type="checkbox"/><br>Moderate dementia <input type="checkbox"/><br>Severe dementia <input type="checkbox"/><br>End of Life <input type="checkbox"/> |
| Assessment of Disease Severity | Tool Used: .....<br>Details:                                                                                                                                                                                                                                                                                                                   |
| Notes                          |                                                                                                                                                                                                                                                                                                                                                |

**Interventions**

|                                 | Description as stated in paper/report |                    |
|---------------------------------|---------------------------------------|--------------------|
| Type of Intervention            |                                       |                    |
| Timing of Intervention          |                                       |                    |
| Duration of Intervention Period |                                       |                    |
| No. of people in each group     | Comparison Group                      | Intervention Group |
|                                 |                                       |                    |
| Implementation                  |                                       |                    |

**Outcomes**

|                 | Description as stated in paper/report |
|-----------------|---------------------------------------|
| Outcome Measure |                                       |

|                                                                   |                                                                                                                                                                                                  |
|-------------------------------------------------------------------|--------------------------------------------------------------------------------------------------------------------------------------------------------------------------------------------------|
| Time Points Measured                                              | Single Time Point Only <input type="checkbox"/><br>Baseline <input type="checkbox"/><br>Follow Up – Details: ..... <input type="checkbox"/>                                                      |
| Group Measured                                                    | Patient <input type="checkbox"/> Caregiver <input type="checkbox"/>                                                                                                                              |
| Source (who the information on outcome measured is obtained from) | Patient <input type="checkbox"/><br>Caregiver <input type="checkbox"/><br>Clinician <input type="checkbox"/><br>General public <input type="checkbox"/><br>Other: ..... <input type="checkbox"/> |
| Tool Used                                                         |                                                                                                                                                                                                  |
| Details                                                           | Score Range: .....                                                                                                                                                                               |
| Outcome tool validated                                            | Yes <input type="checkbox"/> No <input type="checkbox"/> Unclear <input type="checkbox"/>                                                                                                        |
| Notes                                                             |                                                                                                                                                                                                  |

**Results**

| Results                                         | Description as stated in paper/report |                 |           |              |               |                   |                 |             |       |
|-------------------------------------------------|---------------------------------------|-----------------|-----------|--------------|---------------|-------------------|-----------------|-------------|-------|
|                                                 | Pre-clinical                          | Early symp toms | MCI       | Prodromal AD | Mild dementia | Moderate dementia | Severe dementia | End of Life | Total |
| Patients' QoL:<br>A. Baseline<br>B. Follow-up   |                                       |                 |           |              |               |                   |                 |             |       |
| Caregivers' QoL:<br>A. Baseline<br>B. Follow-up |                                       |                 |           |              |               |                   |                 |             |       |
| Comparison Group:                               | Baseline                              |                 | Follow Up |              | Effect Size   |                   | 95% CIs         |             |       |
|                                                 |                                       |                 |           |              |               |                   |                 |             |       |
| Intervention Group                              | Baseline                              |                 | Follow Up |              | Effect Size   |                   | 95% CIs         |             |       |
|                                                 |                                       |                 |           |              |               |                   |                 |             |       |
| Statistical Analysis                            |                                       |                 |           |              |               |                   |                 |             |       |
| Conclusion                                      |                                       |                 |           |              |               |                   |                 |             |       |
| Any other results reported?                     |                                       |                 |           |              |               |                   |                 |             |       |

1  
2  
3  
4  
5  
6  
7  
8  
9  
10  
11  
12  
13  
14  
15  
16  
17  
18  
19  
20  
21  
22  
23  
24  
25  
26  
27  
28  
29  
30  
31  
32  
33  
34  
35  
36  
37  
38  
39  
40  
41  
42  
43  
44  
45  
46  
47  
48  
49  
50  
51  
52  
53  
54  
55  
56  
57  
58  
59  
60

**Conclusions**

|                                                                                           | Description as stated in paper/report |
|-------------------------------------------------------------------------------------------|---------------------------------------|
| Author’s conclusions                                                                      |                                       |
| Reviewer’s conclusions                                                                    |                                       |
| Correspondence required for further study information ( <i>from whom, what and when</i> ) |                                       |
| Notes                                                                                     |                                       |
