# Supplementary material for: Measuring quality of life of people with predementia and dementia and their caregivers: a systematic review protocol
Source: PubMed Central journal article supplement — BMJ Open. 2018 Mar 30;8(3):e019082. doi: 10.1136/bmjopen-2017-019082 (PMC5884378; doi:10.1136/bmjopen-2017-019082), 2018-03-30
Supplement: bmjopen-2017-019082supp002.pdf [file bmjopen-2017-019082supp002.pdf]

Supplementary file 2: Search terms

Medline

| #<br>▲ | Searches                                                                                                                                                                                                                                                                                                                                                                                                                                                                                                              | Results |
|--------|-----------------------------------------------------------------------------------------------------------------------------------------------------------------------------------------------------------------------------------------------------------------------------------------------------------------------------------------------------------------------------------------------------------------------------------------------------------------------------------------------------------------------|---------|
| 1      | *dementia/ or *alzheimer disease/ or exp *dementia, vascular/ or exp *frontotemporal lobar degeneration/                                                                                                                                                                                                                                                                                                                                                                                                              | 98,731  |
| 2      | *Cognitive Dysfunction/                                                                                                                                                                                                                                                                                                                                                                                                                                                                                               | 4,368   |
| 3      | (dementia* or alzheimer*).ti.                                                                                                                                                                                                                                                                                                                                                                                                                                                                                         | 92,750  |
| 4      | ((mild* or early* or preclinical or pre-clinical) adj2 (cognitive impair* or cognitive dysfunction or cognitive decline)).ti.                                                                                                                                                                                                                                                                                                                                                                                         | 5,582   |
| 5      | 1 or 2 or 3 or 4                                                                                                                                                                                                                                                                                                                                                                                                                                                                                                      | 118,970 |
| 6      | *"Quality of Life"/                                                                                                                                                                                                                                                                                                                                                                                                                                                                                                   | 69,834  |
| 7      | ("quality of life" or "quality of wellbeing" or "quality of well-being").ti.                                                                                                                                                                                                                                                                                                                                                                                                                                          | 55,455  |
| 8      | (qol or hqol or hrqol or hrql or hr-qol or hr-ql or euroqol or euro qol or eq5d or eq-5d or eq-vas or vas or whoqol or who qol or reqol*).ti,ab.                                                                                                                                                                                                                                                                                                                                                                      | 81,919  |
| 9      | (sf6 or sf6d or sf12 or sf16 or sf20 or sf36).ti,ab.                                                                                                                                                                                                                                                                                                                                                                                                                                                                  | 2,656   |
| 10     | ((sf or shortform or short-form) adj ("6" or 6d or "12" or "16" or "20" or "36" or six or twelve or sixteen or twenty or thirtysix or thirty six)).ti,ab.                                                                                                                                                                                                                                                                                                                                                             | 26,238  |
| 11     | (icepop or icecap* or duke health profile or dhp or core outcome measure? or core om).ti,ab.                                                                                                                                                                                                                                                                                                                                                                                                                          | 2,772   |
| 12     | (aaiqol or aai-qol or cdqlp or qolas or qolad or qol-ad or qold or dqol or demqol or adrql or adrql or oqold or oqolda or seiql or rsoc-qol or qualid or qualidem or qwb-sa or hsq-12 or zbi or zarit or ces-d or "activity and affect indicator*" or dcm or pwbcip or pwb-cip or npi-d or ham-d or basquid or basqid or stai or stai-5 or bdi or gds or gps or hui or hui-ii or hui-iii or isd or pds or pes-ad or pesad or pes-ad-aes or pesadaes or ghq or cas or cbs or qwb or cbi or bsi or srb or phq-9).ti,ab. | 82,505  |
| 13     | (modified coop* or modified wonca* or "psychological well-being in cognitively impaired persons").ti,ab.                                                                                                                                                                                                                                                                                                                                                                                                              | 23      |
| 14     | *Personal Satisfaction/ or *Patient Satisfaction/                                                                                                                                                                                                                                                                                                                                                                                                                                                                     | 31,894  |
| 15     | ((life or patient* or carer? or caregiver? or spous* or wife or wives or husband?) adj satisfaction).ti.                                                                                                                                                                                                                                                                                                                                                                                                              | 7,129   |
| 16     | ((life or patient* or carer? or caregiver? or spous* or wife or wives or husband?) adj (experience? or preference? or perspective?)).ti.                                                                                                                                                                                                                                                                                                                                                                              | 8,647   |
| 17     | (wellbeing or well-being).ti.                                                                                                                                                                                                                                                                                                                                                                                                                                                                                         | 11,493  |
| 18     | ((life or patient* or carer? or caregiver? or spous* or wife or wives or husband?) adj (experience? or preference? or perspective?)).ti.                                                                                                                                                                                                                                                                                                                                                                              | 8,647   |
| 19     | caregiver time.ti,ab.                                                                                                                                                                                                                                                                                                                                                                                                                                                                                                 | 140     |
| 20     | 14 or 15 or 16 or 17 or 18 or 19                                                                                                                                                                                                                                                                                                                                                                                                                                                                                      | 51,145  |
| 21     | "surveys and questionnaires"/ or self report/                                                                                                                                                                                                                                                                                                                                                                                                                                                                         | 394,101 |
| 22     | (questionnaire? or survey?).ti,ab.                                                                                                                                                                                                                                                                                                                                                                                                                                                                                    | 804,666 |
| 23     | self report.ti,ab.                                                                                                                                                                                                                                                                                                                                                                                                                                                                                                    | 42,432  |
| 24     | ((patient* or carer? or caregiver? or spous* or wife or wives or husband? or proxy) adj report?).ti,ab.                                                                                                                                                                                                                                                                                                                                                                                                               | 7,095   |
| 25     | 21 or 22 or 23 or 24                                                                                                                                                                                                                                                                                                                                                                                                                                                                                                  | 976,414 |

|    |                                                                                                                                                                                 |           |
|----|---------------------------------------------------------------------------------------------------------------------------------------------------------------------------------|-----------|
| 26 | 20 and 25                                                                                                                                                                       | 23,719    |
| 27 | *Caregivers/ and *"Cost of Illness"/                                                                                                                                            | 1,619     |
| 28 | ((carer? or caregiver? or care or spous* or wife or wives or husband?) adj2 (burden* or cost?)).ti.                                                                             | 5,142     |
| 29 | burden interview?.ti.                                                                                                                                                           | 50        |
| 30 | "value of life".ti.                                                                                                                                                             | 87        |
| 31 | *"Activities of Daily Living"/                                                                                                                                                  | 17,986    |
| 32 | ("activities of daily living" or acdl or funtional status).ti.                                                                                                                  | 1,772     |
| 33 | *quality-adjusted life years/                                                                                                                                                   | 1,917     |
| 34 | ("quality adjusted life years" or "disability adjusted life years" or qaly? or daly? or qald or qale or qtime or qaly).ti.                                                      | 764       |
| 35 | *Health Status/                                                                                                                                                                 | 34,353    |
| 36 | *sickness impact profile/                                                                                                                                                       | 2,623     |
| 37 | (standard gamble or "time trade off" or utility index or visual analog*).ti,ab.                                                                                                 | 48,455    |
| 38 | (health utilit* or disutilit* or utility value?).ti,ab.                                                                                                                         | 2,889     |
| 39 | health status.ti.                                                                                                                                                               | 9,145     |
| 40 | 6 or 7 or 8 or 9 or 10 or 11 or 12 or 13 or 26 or 27 or 28 or 29 or 30 or 31 or 32 or 33 or 34 or 35 or 36 or 37 or 38 or 39                                                    | 322,206   |
| 41 | 5 and 40                                                                                                                                                                        | 4,530     |
| 42 | limit 41 to yr="1990 -Current"                                                                                                                                                  | 4,445     |
| 43 | (case reports or clinical trial phase i or comment or editorial or letter).pt. or Clinical Trials, Phase I as Topic/ or (case report or case study or letter? or editorial).ti. | 3,400,815 |
| 44 | grounded theory/ or exp qualitative research/ or (qualitative research or qualitative study or qualitative interview* or grounded theory or hermeneutic*).ti,ab.                | 67,630    |
| 45 | 43 or 44                                                                                                                                                                        | 3,466,599 |
| 46 | 42 not 45                                                                                                                                                                       | 4,087     |

### Embase

| # | Searches                                                                                                                                         | Results |
|---|--------------------------------------------------------------------------------------------------------------------------------------------------|---------|
| 1 | exp *dementia/ or *alzheimer's disease/                                                                                                          | 177,994 |
| 2 | *cognitive impairment/                                                                                                                           | 40,861  |
| 3 | (dementia* or alzheimer*).ti.                                                                                                                    | 119,362 |
| 4 | ((mild* or early* or preclinical or pre-clinical) adj2 (cognitive impair* or cognitive dysfunction or cognitive decline)).ti.                    | 8,090   |
| 5 | 1 or 2 or 3 or 4                                                                                                                                 | 223,452 |
| 6 | exp *"quality of life"/                                                                                                                          | 80,143  |
| 7 | ("quality of life" or "quality of wellbeing" or "quality of well-being").ti.                                                                     | 76,232  |
| 8 | (qol or hqol or hrqol or hrql or hr-qol or hr-ql or euroqol or euro qol or eq5d or eq-5d or eq-vas or vas or whoqol or who qol or reqol*).ti,ab. | 129,834 |
| 9 | (sf6 or sf6d or sf12 or sf16 or sf20 or sf36).ti,ab.                                                                                             | 4,872   |

|    |                                                                                                                                                                                                                                                                                                                                                                                                                                                                                                                         |           |
|----|-------------------------------------------------------------------------------------------------------------------------------------------------------------------------------------------------------------------------------------------------------------------------------------------------------------------------------------------------------------------------------------------------------------------------------------------------------------------------------------------------------------------------|-----------|
| 10 | ((sf or shortform or short-form) adj ("6" or 6d or "12" or "16" or "20" or "36" or six or twelve or sixteen or twenty or thirtysix or thirty six)).ti,ab.                                                                                                                                                                                                                                                                                                                                                               | 37,206    |
| 11 | (icepop or icecap* or duke health profile or dhp or core outcome measure? or core om).ti,ab.                                                                                                                                                                                                                                                                                                                                                                                                                            | 3,316     |
| 12 | (aaiqol or aai-qol or cdqlp or qolas or qolad or qol-ad or qold or dqol or demqol or adrql or adrqol or oqold or oqolda or seiqol or rsoc-qol or qualid or qualidem or qwb-sa or hsq-12 or zbi or zarit or ces-d or "activity and affect indicator*" or dcm or pwbcip or pwb-cip or npi-d or ham-d or basquid or basqid or stai or stai-5 or bdi or gds or gps or hui or hui-ii or hui-iii or isd or pds or pes-ad or pesad or pes-ad-aes or pesadaes or ghq or cas or cbs or qwb or cbi or bsi or srb or phq-9).ti,ab. | 114,337   |
| 13 | (modified coop* or modified wonca* or "psychological well-being in cognitively impaired persons").ti,ab.                                                                                                                                                                                                                                                                                                                                                                                                                | 29        |
| 14 | *client satisfaction/ or *life satisfaction/                                                                                                                                                                                                                                                                                                                                                                                                                                                                            | 1,991     |
| 15 | ((life or patient* or carer? or caregiver? or spous* or wife or wives or husband?) adj satisfaction).ti.                                                                                                                                                                                                                                                                                                                                                                                                                | 8,839     |
| 16 | ((life or patient* or carer? or caregiver? or spous* or wife or wives or husband?) adj (experience? or preference? or perspective?)).ti.                                                                                                                                                                                                                                                                                                                                                                                | 11,228    |
| 17 | (wellbeing or well-being).ti.                                                                                                                                                                                                                                                                                                                                                                                                                                                                                           | 12,234    |
| 18 | ((life or patient* or carer? or caregiver? or spous* or wife or wives or husband?) adj (experience? or preference? or perspective?)).ti.                                                                                                                                                                                                                                                                                                                                                                                | 11,228    |
| 19 | caregiver time.ti,ab.                                                                                                                                                                                                                                                                                                                                                                                                                                                                                                   | 183       |
| 20 | 14 or 15 or 16 or 17 or 18 or 19                                                                                                                                                                                                                                                                                                                                                                                                                                                                                        | 33,365    |
| 21 | "surveys and questionnaires"/ or self report/                                                                                                                                                                                                                                                                                                                                                                                                                                                                           | 582,726   |
| 22 | (questionnaire? or survey?).ti,ab.                                                                                                                                                                                                                                                                                                                                                                                                                                                                                      | 1,011,521 |
| 23 | self report.ti,ab.                                                                                                                                                                                                                                                                                                                                                                                                                                                                                                      | 50,950    |
| 24 | ((patient* or carer? or caregiver? or spous* or wife or wives or husband? or proxy) adj report?).ti,ab.                                                                                                                                                                                                                                                                                                                                                                                                                 | 10,383    |
| 25 | 21 or 22 or 23 or 24                                                                                                                                                                                                                                                                                                                                                                                                                                                                                                    | 1,187,376 |
| 26 | 20 and 25                                                                                                                                                                                                                                                                                                                                                                                                                                                                                                               | 14,705    |
| 27 | *caregiver burden/                                                                                                                                                                                                                                                                                                                                                                                                                                                                                                      | 1,934     |
| 28 | ((carer? or caregiver? or care or spous* or wife or wives or husband?) adj2 (burden* or cost?)).ti.                                                                                                                                                                                                                                                                                                                                                                                                                     | 6,435     |
| 29 | burden interview?.ti.                                                                                                                                                                                                                                                                                                                                                                                                                                                                                                   | 59        |
| 30 | "value of life".ti.                                                                                                                                                                                                                                                                                                                                                                                                                                                                                                     | 96        |
| 31 | *"activities of daily living"/                                                                                                                                                                                                                                                                                                                                                                                                                                                                                          | 8,385     |
| 32 | ("activities of daily living" or acdl or funtional status).ti.                                                                                                                                                                                                                                                                                                                                                                                                                                                          | 2,164     |
| 33 | *quality adjusted life year/                                                                                                                                                                                                                                                                                                                                                                                                                                                                                            | 1,084     |
| 34 | ("quality adjusted life years" or "disability adjusted life years" or qaly? or daly? or qald or qale or qtime or qaly).ti.                                                                                                                                                                                                                                                                                                                                                                                              | 898       |
| 35 | *Health Status/                                                                                                                                                                                                                                                                                                                                                                                                                                                                                                         | 28,930    |
| 36 | *sickness impact profile/                                                                                                                                                                                                                                                                                                                                                                                                                                                                                               | 689       |
| 37 | (standard gamble or "time trade off" or utility index or visual analog*).ti,ab.                                                                                                                                                                                                                                                                                                                                                                                                                                         | 64,774    |
| 38 | (health utilit* or disutilit* or utility value?).ti,ab.                                                                                                                                                                                                                                                                                                                                                                                                                                                                 | 4,516     |
| 39 | health status.ti.                                                                                                                                                                                                                                                                                                                                                                                                                                                                                                       | 9,969     |
| 40 | 6 or 7 or 8 or 9 or 10 or 11 or 12 or 13 or 26 or 27 or 28 or 29 or 30 or 31 or 32 or 33 or 34 or 35 or 36 or 37 or 38 or 39                                                                                                                                                                                                                                                                                                                                                                                            | 393,955   |

|    |                                                                                                                                                                  |           |
|----|------------------------------------------------------------------------------------------------------------------------------------------------------------------|-----------|
| 41 | 5 and 40                                                                                                                                                         | 6,763     |
| 42 | limit 41 to yr="1990 -Current"                                                                                                                                   | 6,613     |
| 43 | (editorial or letter or note or press).pt. or "phase 1 clinical trial (topic)"/ or case report/ or (case report or case study or letter? or editorial).ti.       | 4,421,368 |
| 44 | grounded theory/ or exp qualitative research/ or (qualitative research or qualitative study or qualitative interview* or grounded theory or hermeneutic*).ti,ab. | 71,138    |
| 45 | 43 or 44                                                                                                                                                         | 4,489,168 |
| 46 | 42 not 45                                                                                                                                                        | 6,122     |

### PsycINFO

| #  | Searches                                                                                                                                                                                                                                                                                                                                                                                                                                                                                                              | Results |
|----|-----------------------------------------------------------------------------------------------------------------------------------------------------------------------------------------------------------------------------------------------------------------------------------------------------------------------------------------------------------------------------------------------------------------------------------------------------------------------------------------------------------------------|---------|
| 1  | exp *dementia/ or *alzheimer's disease/                                                                                                                                                                                                                                                                                                                                                                                                                                                                               | 58,737  |
| 2  | *cognitive impairment/                                                                                                                                                                                                                                                                                                                                                                                                                                                                                                | 23,977  |
| 3  | (dementia* or alzheimer*).ti.                                                                                                                                                                                                                                                                                                                                                                                                                                                                                         | 47,312  |
| 4  | ((mild* or early* or preclinical or pre-clinical) adj2 (cognitive impair* or cognitive dysfunction or cognitive decline)).ti.                                                                                                                                                                                                                                                                                                                                                                                         | 3,675   |
| 5  | 1 or 2 or 3 or 4                                                                                                                                                                                                                                                                                                                                                                                                                                                                                                      | 77,854  |
| 6  | exp *"quality of life"/                                                                                                                                                                                                                                                                                                                                                                                                                                                                                               | 28,944  |
| 7  | ("quality of life" or "quality of wellbeing" or "quality of well-being").ti.                                                                                                                                                                                                                                                                                                                                                                                                                                          | 17,544  |
| 8  | (qol or hqol or hrqol or hrql or hr-qol or hr-ql or euroqol or euro qol or eq5d or eq-5d or eq-vas or vas or whoqol or who qol or reqol*).ti,ab.                                                                                                                                                                                                                                                                                                                                                                      | 15,758  |
| 9  | (sf6 or sf6d or sf12 or sf16 or sf20 or sf36).ti,ab.                                                                                                                                                                                                                                                                                                                                                                                                                                                                  | 243     |
| 10 | ((sf or shortform or short-form) adj ("6" or 6d or "12" or "16" or "20" or "36" or six or twelve or sixteen or twenty or thirtysix or thirty six)).ti,ab.                                                                                                                                                                                                                                                                                                                                                             | 5,546   |
| 11 | (icepop or icecap* or duke health profile or dhp or core outcome measure? or core om).ti,ab.                                                                                                                                                                                                                                                                                                                                                                                                                          | 367     |
| 12 | (aaiqol or aai-qol or cdqlp or qolas or qolad or qol-ad or qold or dqol or demqol or adrql or adrql or oqold or oqolda or seiql or rsoc-qol or qualid or qualidem or qwb-sa or hsq-12 or zbi or zarit or ces-d or "activity and affect indicator*" or dcm or pwbcip or pwb-cip or npi-d or ham-d or basquid or basqid or stai or stai-5 or bdi or gds or gps or hui or hui-ii or hui-iii or isd or pds or pes-ad or pesad or pes-ad-aes or pesadaes or ghq or cas or cbs or qwb or cbi or bsi or srb or phq-9).ti,ab. | 27,360  |
| 13 | (modified coop* or modified wonca* or "psychological well-being in cognitively impaired persons").ti,ab.                                                                                                                                                                                                                                                                                                                                                                                                              | 14      |
| 14 | *client satisfaction/ or *life satisfaction/                                                                                                                                                                                                                                                                                                                                                                                                                                                                          | 10,500  |
| 15 | ((life or patient* or carer? or caregiver? or spous* or wife or wives or husband?) adj satisfaction).ti.                                                                                                                                                                                                                                                                                                                                                                                                              | 4,378   |
| 16 | ((life or patient* or carer? or caregiver? or spous* or wife or wives or husband?) adj (experience? or preference? or perspective?)).ti.                                                                                                                                                                                                                                                                                                                                                                              | 3,089   |
| 17 | (wellbeing or well-being).ti.                                                                                                                                                                                                                                                                                                                                                                                                                                                                                         | 17,565  |
| 18 | ((life or patient* or carer? or caregiver? or spous* or wife or wives or husband?) adj (experience? or preference? or perspective?)).ti.                                                                                                                                                                                                                                                                                                                                                                              | 3,089   |
| 19 | caregiver time.ti,ab.                                                                                                                                                                                                                                                                                                                                                                                                                                                                                                 | 51      |

|    |                                                                                                                                                              |         |
|----|--------------------------------------------------------------------------------------------------------------------------------------------------------------|---------|
| 20 | 14 or 15 or 16 or 17 or 18 or 19                                                                                                                             | 30,716  |
| 21 | questionnaires/ or surveys/ or self report/                                                                                                                  | 36,535  |
| 22 | (questionnaire? or survey?).ti,ab.                                                                                                                           | 409,092 |
| 23 | self report.ti,ab.                                                                                                                                           | 49,405  |
| 24 | ((patient* or carer? or caregiver? or spous* or wife or wives or husband? or proxy) adj report?).ti,ab.                                                      | 2,724   |
| 25 | 21 or 22 or 23 or 24                                                                                                                                         | 446,678 |
| 26 | 20 and 25                                                                                                                                                    | 10,093  |
| 27 | *caregiver burden/                                                                                                                                           | 4,122   |
| 28 | ((carer? or caregiver? or care or spous* or wife or wives or husband?) adj2 (burden* or cost?)).ti.                                                          | 1,257   |
| 29 | burden interview?.ti.                                                                                                                                        | 42      |
| 30 | "value of life".ti.                                                                                                                                          | 33      |
| 31 | *"activities of daily living"/                                                                                                                               | 3,835   |
| 32 | ("activities of daily living" or acdl or funtional status).ti.                                                                                               | 734     |
| 33 | ("quality adjusted life years" or "disability adjusted life years" or qaly? or daly? or qald or qale or qtime or qaly).ti.                                   | 142     |
| 34 | (standard gamble or "time trade off" or utility index or visual analog*).ti,ab.                                                                              | 6,195   |
| 35 | (health utilit* or disutilit* or utility value?).ti,ab.                                                                                                      | 877     |
| 36 | health status.ti.                                                                                                                                            | 2,312   |
| 37 | 6 or 7 or 8 or 9 or 10 or 11 or 12 or 13 or 26 or 27 or 28 or 29 or 30 or 31 or 32 or 33 or 34 or 35 or 36                                                   | 85,145  |
| 38 | 5 and 37                                                                                                                                                     | 4,392   |
| 39 | limit 38 to yr="1990 -Current"                                                                                                                               | 4,344   |
| 40 | case report/ or (case report or case study or letter? or editorial).ti.                                                                                      | 62,005  |
| 41 | grounded theory/ or qualitative research/ or (qualitative research or qualitative study or qualitative interview* or grounded theory or hermeneutic*).ti,ab. | 61,499  |
| 42 | 40 or 41                                                                                                                                                     | 122,316 |
| 43 | 39 not 42                                                                                                                                                    | 4,208   |

*Cochrane Database of Systematic Reviews, Cochrane Central Register of Controlled Trials, Database Abstract of Reviews of Effects, NHS Economic Evaluation Database*

| ID | Search                                                                                                                                                                                |
|----|---------------------------------------------------------------------------------------------------------------------------------------------------------------------------------------|
| #1 | MeSH descriptor: [Dementia] explode all trees                                                                                                                                         |
| #2 | MeSH descriptor: [Mild Cognitive Impairment] explode all trees                                                                                                                        |
| #3 | dementia* or alzheimer*:ti (Word variations have been searched)                                                                                                                       |
| #4 | ((mild* or early* or preclinical or pre-clinical) near/2 (cognitive impair* or cognitive dysfunction or cognitive decline)):ti (Word variations have been searched)                   |
| #5 | #1 or #2 or #3 or #4                                                                                                                                                                  |
| #6 | MeSH descriptor: [Quality of Life] explode all trees                                                                                                                                  |
| #7 | quality of life or "quality of wellbeing" or "quality of well-being":ti (Word variations have been searched)                                                                          |
| #8 | qol or hqol or hrqol or hrql or hr-qol or hr-ql or euroqol or euro qol or eq5d or eq-5d or eq-vas or vas or whoqol or who qol or reqol*:ti,ab,kw (Word variations have been searched) |

|     |                                                                                                                                                                                                                                                                                                                                                                                                                                                                                                                                                            |
|-----|------------------------------------------------------------------------------------------------------------------------------------------------------------------------------------------------------------------------------------------------------------------------------------------------------------------------------------------------------------------------------------------------------------------------------------------------------------------------------------------------------------------------------------------------------------|
| #9  | sf6 or sf6d or sf12 or sf16 or sf20 or sf36:ti,ab,kw (Word variations have been searched)                                                                                                                                                                                                                                                                                                                                                                                                                                                                  |
| #10 | ((sf or shortform or short-form) next ("6" or 6d or "12" or "16" or "20" or "36" or six or twelve or sixteen or twenty or thirtysix or thirty six)):ti,ab,kw (Word variations have been searched)                                                                                                                                                                                                                                                                                                                                                          |
| #11 | icepop or icecap* or "duke health profile" or dhp or "core outcome measure?" or "core om":ti,ab,kw (Word variations have been searched)                                                                                                                                                                                                                                                                                                                                                                                                                    |
| #12 | aaiqol or aai-qol or cdqlp or qolas or qolad or qol-ad or qold or dqol or demqol or adrql or adrqol or oqold or oqolda or seiqol or rsoc-qol or qualid or qualidem or qwb-sa or hsq-12 or zbi or zarit or ces-d or "activity and affect indicator*" or dcm or pwbcip or pwb-cip or npd or ham-d or basquid or basqid or stai or stai-5 or bdi or gds or gps or hui or hui-ii or hui-iii or isd or pds or pes-ad or pesad or pes-ad-aes or pesadaes or ghq or cas or cbs or qwb or cbi or bsi or srb or phq-9:ti,ab,kw (Word variations have been searched) |
| #13 | modified coop* or "modified wonca*" or "psychological well-being in cognitively impaired persons":ti,ab,kw (Word variations have been searched)                                                                                                                                                                                                                                                                                                                                                                                                            |
| #14 | MeSH descriptor: [Patient Satisfaction] this term only                                                                                                                                                                                                                                                                                                                                                                                                                                                                                                     |
| #15 | MeSH descriptor: [Personal Satisfaction] explode all trees                                                                                                                                                                                                                                                                                                                                                                                                                                                                                                 |
| #16 | ((life or patient* or carer? or caregiver? or spous* or wife or wives or husband?) next satisfaction):ti,ab,kw (Word variations have been searched)                                                                                                                                                                                                                                                                                                                                                                                                        |
| #17 | ((life or patient* or carer? or caregiver? or spous* or wife or wives or husband?) next (experience? or preference? or perspective?):ti,ab,kw (Word variations have been searched)                                                                                                                                                                                                                                                                                                                                                                         |
| #18 | wellbeing or well-being:ti (Word variations have been searched)                                                                                                                                                                                                                                                                                                                                                                                                                                                                                            |
| #19 | ((life or patient* or carer? or caregiver? or spous* or wife or wives or husband?) next (experience? or preference? or perspective?):ti,ab,kw (Word variations have been searched)                                                                                                                                                                                                                                                                                                                                                                         |
| #20 | caregiver time:ti,ab,kw (Word variations have been searched)                                                                                                                                                                                                                                                                                                                                                                                                                                                                                               |
| #21 | ((carer? or caregiver? or care or spous* or wife or wives or husband?) near/2 (burden* or cost?):ti,ab,kw (Word variations have been searched)                                                                                                                                                                                                                                                                                                                                                                                                             |
| #22 | burden interview?:ti,ab,kw (Word variations have been searched)                                                                                                                                                                                                                                                                                                                                                                                                                                                                                            |
| #23 | value of life:ti,ab,kw (Word variations have been searched)                                                                                                                                                                                                                                                                                                                                                                                                                                                                                                |
| #24 | MeSH descriptor: [Activities of Daily Living] explode all trees                                                                                                                                                                                                                                                                                                                                                                                                                                                                                            |
| #25 | activities of daily living or acdl or "functional status":ti,ab,kw (Word variations have been searched)                                                                                                                                                                                                                                                                                                                                                                                                                                                    |
| #26 | MeSH descriptor: [Quality-Adjusted Life Years] explode all trees                                                                                                                                                                                                                                                                                                                                                                                                                                                                                           |
| #27 | quality adjusted life years or "disability adjusted life years" or qaly? or daly? or qald or qale or qtime or qaly:ti,ab,kw (Word variations have been searched)                                                                                                                                                                                                                                                                                                                                                                                           |
| #28 | MeSH descriptor: [Health Status] this term only                                                                                                                                                                                                                                                                                                                                                                                                                                                                                                            |
| #29 | MeSH descriptor: [Sickness Impact Profile] explode all trees                                                                                                                                                                                                                                                                                                                                                                                                                                                                                               |
| #30 | standard gamble or "time trade off" or "utility index" or "visual analog*":ti,ab,kw (Word variations have been searched)                                                                                                                                                                                                                                                                                                                                                                                                                                   |
| #31 | health utilit* or disutilit* or "utility value?":ti,ab,kw (Word variations have been searched)                                                                                                                                                                                                                                                                                                                                                                                                                                                             |
| #32 | HEALTH STATUS:ti (Word variations have been searched)                                                                                                                                                                                                                                                                                                                                                                                                                                                                                                      |
| #33 | #6 or #7 or #8 or #9 or #10 or #11 or #12 or #13 or #14 or #15 or #16 or #17 or #18 or #19 or #20 or #21 or #22 or #23 or #24 or #25 or #26 or #27 or #28 or #29 or #30 or #31 or #32                                                                                                                                                                                                                                                                                                                                                                      |
| #34 | #5 and #33                                                                                                                                                                                                                                                                                                                                                                                                                                                                                                                                                 |

## QoL Data Extraction Form

|                                                                                                               |  |
|---------------------------------------------------------------------------------------------------------------|--|
| Study ID ( <i>surname of first author and year first full report of study was published e.g. Smith 2001</i> ) |  |
| Publication Title                                                                                             |  |
| Notes:                                                                                                        |  |

### General Information

|                                                       |  |
|-------------------------------------------------------|--|
| Date when form was completed ( <i>dd/mm/yyyy</i> )    |  |
| Name of person extracting data                        |  |
| Language of study                                     |  |
| Corresponding author contact details                  |  |
| Publication type (e.g. full report, abstract, letter) |  |
| Notes:                                                |  |

### Study Design

|                   | Descriptions as stated in the study                                                                                                                                                                                                                                                                                                                                                                                                                                                                                                                                                                                                                        |
|-------------------|------------------------------------------------------------------------------------------------------------------------------------------------------------------------------------------------------------------------------------------------------------------------------------------------------------------------------------------------------------------------------------------------------------------------------------------------------------------------------------------------------------------------------------------------------------------------------------------------------------------------------------------------------------|
| Aim of the study  |                                                                                                                                                                                                                                                                                                                                                                                                                                                                                                                                                                                                                                                            |
| Type of study     | Interventional study: <ul style="list-style-type: none"> <li>Randomised controlled trial <input type="checkbox"/></li> <li>Non-randomised controlled trial <input type="checkbox"/></li> <li>Cross-over randomised controlled trial <input type="checkbox"/></li> <li>Before-and-after study <input type="checkbox"/></li> </ul> Observational study: <ul style="list-style-type: none"> <li>Case-control study <input type="checkbox"/></li> <li>Cohort study <input type="checkbox"/></li> <li>Cross-sectional study <input type="checkbox"/></li> <li>Other (specify):</li> </ul> Register based study <input type="checkbox"/> Other design (specify): |
| Type of analysis  | Prospective <input type="checkbox"/><br>Retrospective <input type="checkbox"/><br>Unclear <input type="checkbox"/>                                                                                                                                                                                                                                                                                                                                                                                                                                                                                                                                         |
| QoL instrument(s) |                                                                                                                                                                                                                                                                                                                                                                                                                                                                                                                                                                                                                                                            |

|                                                                                                        |                                                                                           |
|--------------------------------------------------------------------------------------------------------|-------------------------------------------------------------------------------------------|
| QoL instrument language                                                                                |                                                                                           |
| QoL instrument mode of administration (e.g. paper copy; electronic; telephone; face-to-face interview) |                                                                                           |
| Outcomes measured other than QoL?                                                                      |                                                                                           |
| Start date                                                                                             |                                                                                           |
| End date                                                                                               |                                                                                           |
| Follow up (in months)                                                                                  |                                                                                           |
| Ethical approval needed/ obtained for study                                                            | <input type="checkbox"/> Yes <input type="checkbox"/> No <input type="checkbox"/> Unclear |

**Participants**

|                                               | Description as stated in paper/report                                                                                                                                                                                                                                                                                     |
|-----------------------------------------------|---------------------------------------------------------------------------------------------------------------------------------------------------------------------------------------------------------------------------------------------------------------------------------------------------------------------------|
| Country (ies)                                 |                                                                                                                                                                                                                                                                                                                           |
| Population Description                        |                                                                                                                                                                                                                                                                                                                           |
| Type of Participant                           | Patients <input type="checkbox"/><br>Caregivers <input type="checkbox"/><br>Other: ..... <input type="checkbox"/>                                                                                                                                                                                                         |
| Setting                                       | Community <input type="checkbox"/><br>Institutional <input type="checkbox"/><br>Primary Care <input type="checkbox"/><br>Secondary Care <input type="checkbox"/><br>Tertiary Care <input type="checkbox"/><br>Mixed <input type="checkbox"/><br>Unclear <input type="checkbox"/><br>Other: ..... <input type="checkbox"/> |
| <b>Enrolment Eligibility</b>                  |                                                                                                                                                                                                                                                                                                                           |
| A. Inclusion Criteria                         | A.                                                                                                                                                                                                                                                                                                                        |
| B. Exclusion Criteria                         | B.                                                                                                                                                                                                                                                                                                                        |
| Recruitment Process                           |                                                                                                                                                                                                                                                                                                                           |
| Sample Size                                   |                                                                                                                                                                                                                                                                                                                           |
| Mean age of patients                          |                                                                                                                                                                                                                                                                                                                           |
| Patients gender (% of females in the sample)  |                                                                                                                                                                                                                                                                                                                           |
| Mean age of caregiver                         |                                                                                                                                                                                                                                                                                                                           |
| Caregiver gender (% of females in the sample) |                                                                                                                                                                                                                                                                                                                           |
| Caregiver relationship to patient             | Spouse _____%      Daughter/son-in-law _____%<br>Daughter _____%      Grandchild _____%                                                                                                                                                                                                                                   |



|                                                 |                                                                                               |
|-------------------------------------------------|-----------------------------------------------------------------------------------------------|
|                                                 | Son _____%      Friend _____%<br>Brother _____%      Other: _____ and _____%<br>Sister _____% |
| Any other relevant sociodemographic information |                                                                                               |
| Notes:                                          |                                                                                               |

**Dementia Diagnosis**

|                                |                                                                                                                                                                                                                                                                                                                                                |
|--------------------------------|------------------------------------------------------------------------------------------------------------------------------------------------------------------------------------------------------------------------------------------------------------------------------------------------------------------------------------------------|
|                                | Description as stated in paper/report                                                                                                                                                                                                                                                                                                          |
| Type of Dementia               | Alzheimer's Disease <input type="checkbox"/><br>Lewy Body Dementia <input type="checkbox"/><br>Vascular Dementia <input type="checkbox"/><br>Mixed <input type="checkbox"/><br>Other: ..... <input type="checkbox"/>                                                                                                                           |
| Disease Severity               | Pre-clinical dementia <input type="checkbox"/><br>Early symptoms <input type="checkbox"/><br>MCI <input type="checkbox"/><br>Prodromal AD <input type="checkbox"/><br>Mild dementia <input type="checkbox"/><br>Moderate dementia <input type="checkbox"/><br>Severe dementia <input type="checkbox"/><br>End of Life <input type="checkbox"/> |
| Assessment of Disease Severity | Tool Used: .....<br>Details:                                                                                                                                                                                                                                                                                                                   |
| Notes                          |                                                                                                                                                                                                                                                                                                                                                |

**Interventions**

|                                 |                                       |                    |
|---------------------------------|---------------------------------------|--------------------|
|                                 | Description as stated in paper/report |                    |
| Type of Intervention            |                                       |                    |
| Timing of Intervention          |                                       |                    |
| Duration of Intervention Period |                                       |                    |
| No. of people in each group     | Comparison Group                      | Intervention Group |
|                                 |                                       |                    |
| Implementation                  |                                       |                    |

**Outcomes**

|                 |                                       |
|-----------------|---------------------------------------|
|                 | Description as stated in paper/report |
| Outcome Measure |                                       |

|                                                                   |                                                                                                                                                                                                  |
|-------------------------------------------------------------------|--------------------------------------------------------------------------------------------------------------------------------------------------------------------------------------------------|
| Time Points Measured                                              | Single Time Point Only <input type="checkbox"/><br>Baseline <input type="checkbox"/><br>Follow Up – Details: ..... <input type="checkbox"/>                                                      |
| Group Measured                                                    | Patient <input type="checkbox"/> Caregiver <input type="checkbox"/>                                                                                                                              |
| Source (who the information on outcome measured is obtained from) | Patient <input type="checkbox"/><br>Caregiver <input type="checkbox"/><br>Clinician <input type="checkbox"/><br>General public <input type="checkbox"/><br>Other: ..... <input type="checkbox"/> |
| Tool Used                                                         |                                                                                                                                                                                                  |
| Details                                                           | Score Range: .....                                                                                                                                                                               |
| Outcome tool validated                                            | Yes <input type="checkbox"/> No <input type="checkbox"/> Unclear <input type="checkbox"/>                                                                                                        |
| Notes                                                             |                                                                                                                                                                                                  |

### **Results**

| Results                                         | Description as stated in paper/report |                |           |              |               |                   |                 |             |       |
|-------------------------------------------------|---------------------------------------|----------------|-----------|--------------|---------------|-------------------|-----------------|-------------|-------|
|                                                 | Pre-clinical                          | Early symptoms | MCI       | Prodromal AD | Mild dementia | Moderate dementia | Severe dementia | End of Life | Total |
| Patients' QoL:<br>A. Baseline<br>B. Follow-up   |                                       |                |           |              |               |                   |                 |             |       |
| Caregivers' QoL:<br>A. Baseline<br>B. Follow-up |                                       |                |           |              |               |                   |                 |             |       |
| Comparison Group:                               | Baseline                              |                | Follow Up |              | Effect Size   |                   | 95% CIs         |             |       |
|                                                 |                                       |                |           |              |               |                   |                 |             |       |
| Intervention Group                              | Baseline                              |                | Follow Up |              | Effect Size   |                   | 95% CIs         |             |       |
|                                                 |                                       |                |           |              |               |                   |                 |             |       |
| Statistical Analysis                            |                                       |                |           |              |               |                   |                 |             |       |
| Conclusion                                      |                                       |                |           |              |               |                   |                 |             |       |
| Any other results reported?                     |                                       |                |           |              |               |                   |                 |             |       |

## Conclusions

|                                                                                           | Description as stated in paper/report |
|-------------------------------------------------------------------------------------------|---------------------------------------|
| Author's conclusions                                                                      |                                       |
| Reviewer's conclusions                                                                    |                                       |
| Correspondence required for further study information ( <i>from whom, what and when</i> ) |                                       |
| Notes                                                                                     |                                       |
